# Supplementary material for: Systematic Identification of Cell-Cell Communication Networks in the Developing Brain
Source: PubMed Central journal article supplement (PMC6838536; doi:10.1016/j.isci.2019.10.026), 2019-10-17
Supplement: mmc1.pdf [file mmc1.pdf]

**ISCI, Volume 21**

## **Supplemental Information**

### **Systematic Identification of Cell-Cell**

### **Communication Networks in the Developing Brain**

**Bilal N. Sheikh, Olga Bondareva, Sukanya Guhathakurta, Tsz Hong Tsang, Katarzyna Sikora, Nadim Aizarani, Sagar, Herbert Holz, Dominic Grün, Lutz Hein, and Asifa Akhtar**

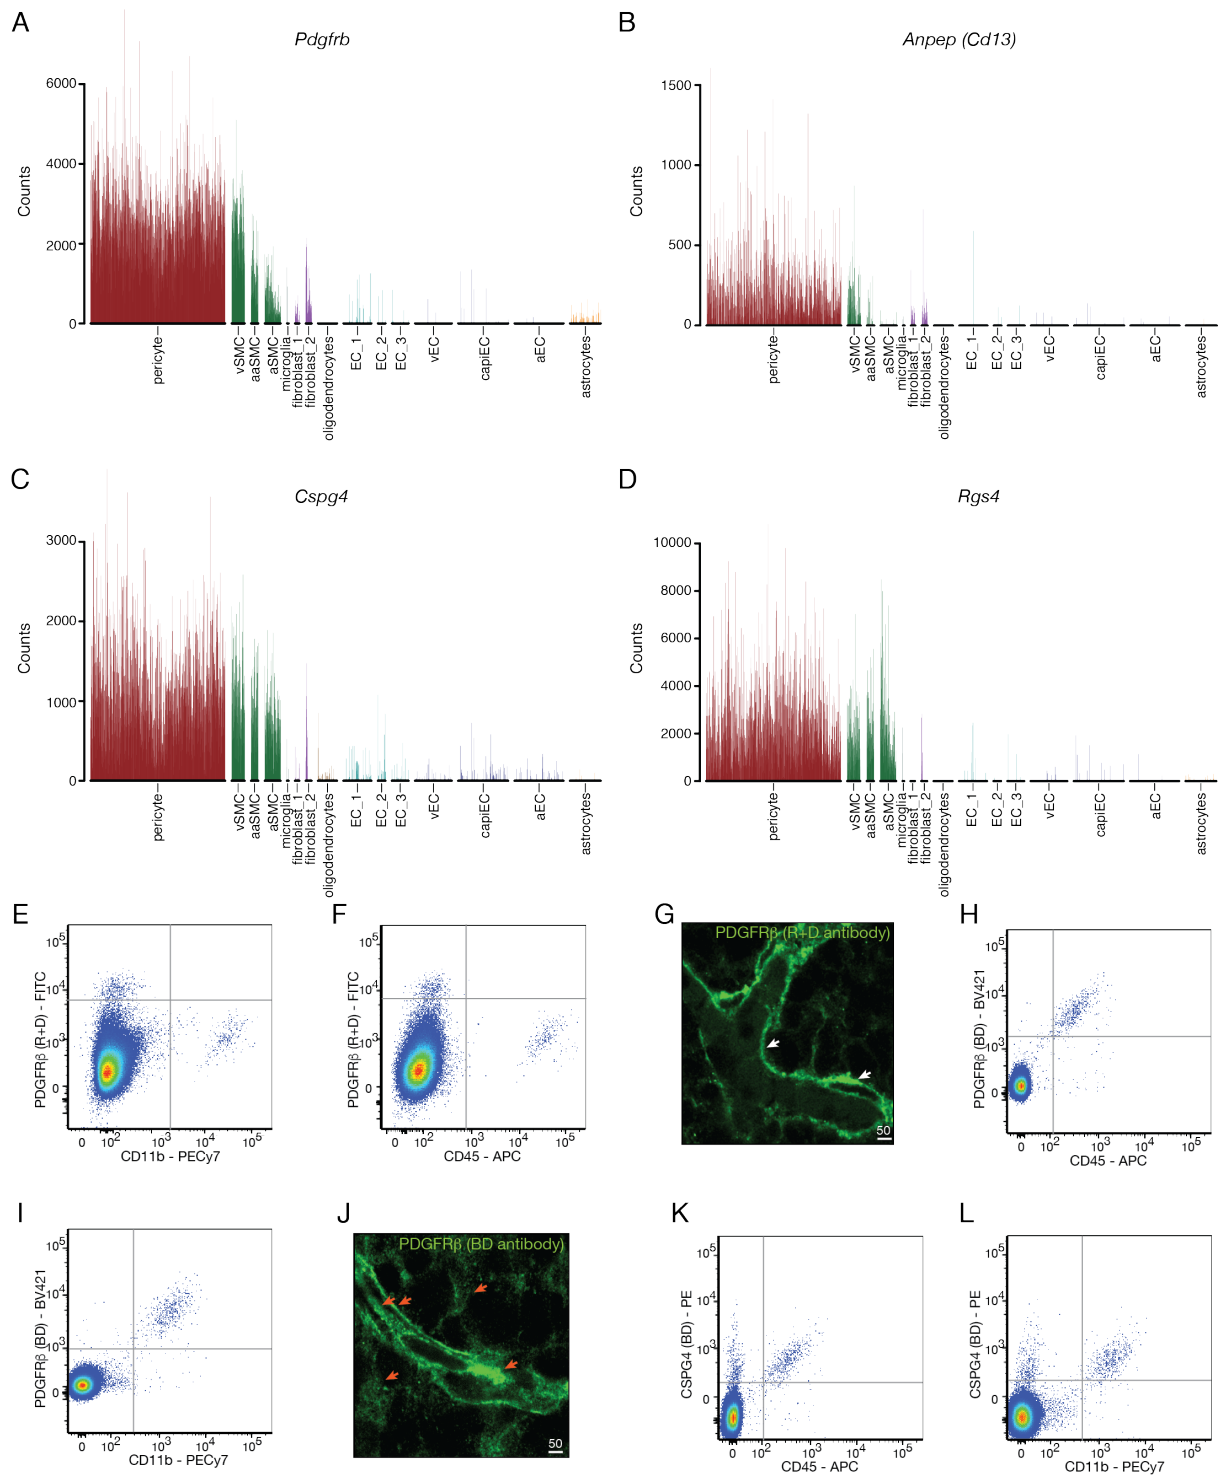

### Figure S1

Screening for potential mural cell markers and antibodies.

Related to Figure 1

**(A-D)** Expression of potential mural cell markers in the published scRNA-seq database by the Betscholtz laboratory (Vanlandewijck et al., 2018). **(A)** *Pdgfrb* showed consistently high expression in all pericytes and smooth muscle cells. PDGFR $\beta$  is expressed on the cell surface making it ideal for downstream use. **(B)** *Anpep (Cd13)* showed weak expression that was undetectable in some pericytes. While this may be due to the low sensitivity of scRNA-seq, it also suggests that CD13 expression may be heterogeneous within the mural cell population resulting in some pericytes and

smooth muscle cells remaining undetected. **(C)** *Cspg4* displayed strong expression in pericytes and smooth muscle cells and thus was shortlisted for downstream testing. **(D)** While *Rgs4* showed strong expression in pericytes and smooth muscle cells, it is an intracellular marker and thus not conducive to FACS. **(E)** Flow cytometry plot comparing the expression of PDGFR $\beta$  (R+D antibody) and the microglia-specific marker CD11b. PDGFR $\beta$  (R+D) antibody did not show any cross reactivity with CD11b. **(F)** Flow cytometry plot showing no overlap in staining with the PDGFR $\beta$  (R+D) antibody and the microglia and hematopoietic marker CD45. **(G)** Immunofluorescence staining using the PDGFR $\beta$  (R+D) antibody showing clear peri-vascular staining (white arrows) in the E14.5 brain cortex. Also see Figure 1C. **(H-I)** Flow cytometry plot showing cross-reactivity between the Becton Dickinson (BD) PDGFR $\beta$  antibody and microglial markers **(H)** CD45 and **(I)** CD11b. **(J)** Immunofluorescence staining using the PDGFR $\beta$  (BD) antibody showing unexpected intracellular staining in vascular cells as well as widespread background signal outside of the vasculature (marked by red arrows). **(K-L)** Flow cytometry plot showing cross-reactivity between the Becton Dickinson (BD) CSPG4 antibody and microglial markers **(K)** CD45 and **(L)** CD11b.

Based on these analyses, the BD PDGFR $\beta$  and CSPG4 antibodies were not used and all experiments utilised the PDGFR $\beta$  antibody from R+D.

N = 3 to 10 replicates per experiment in E-L.

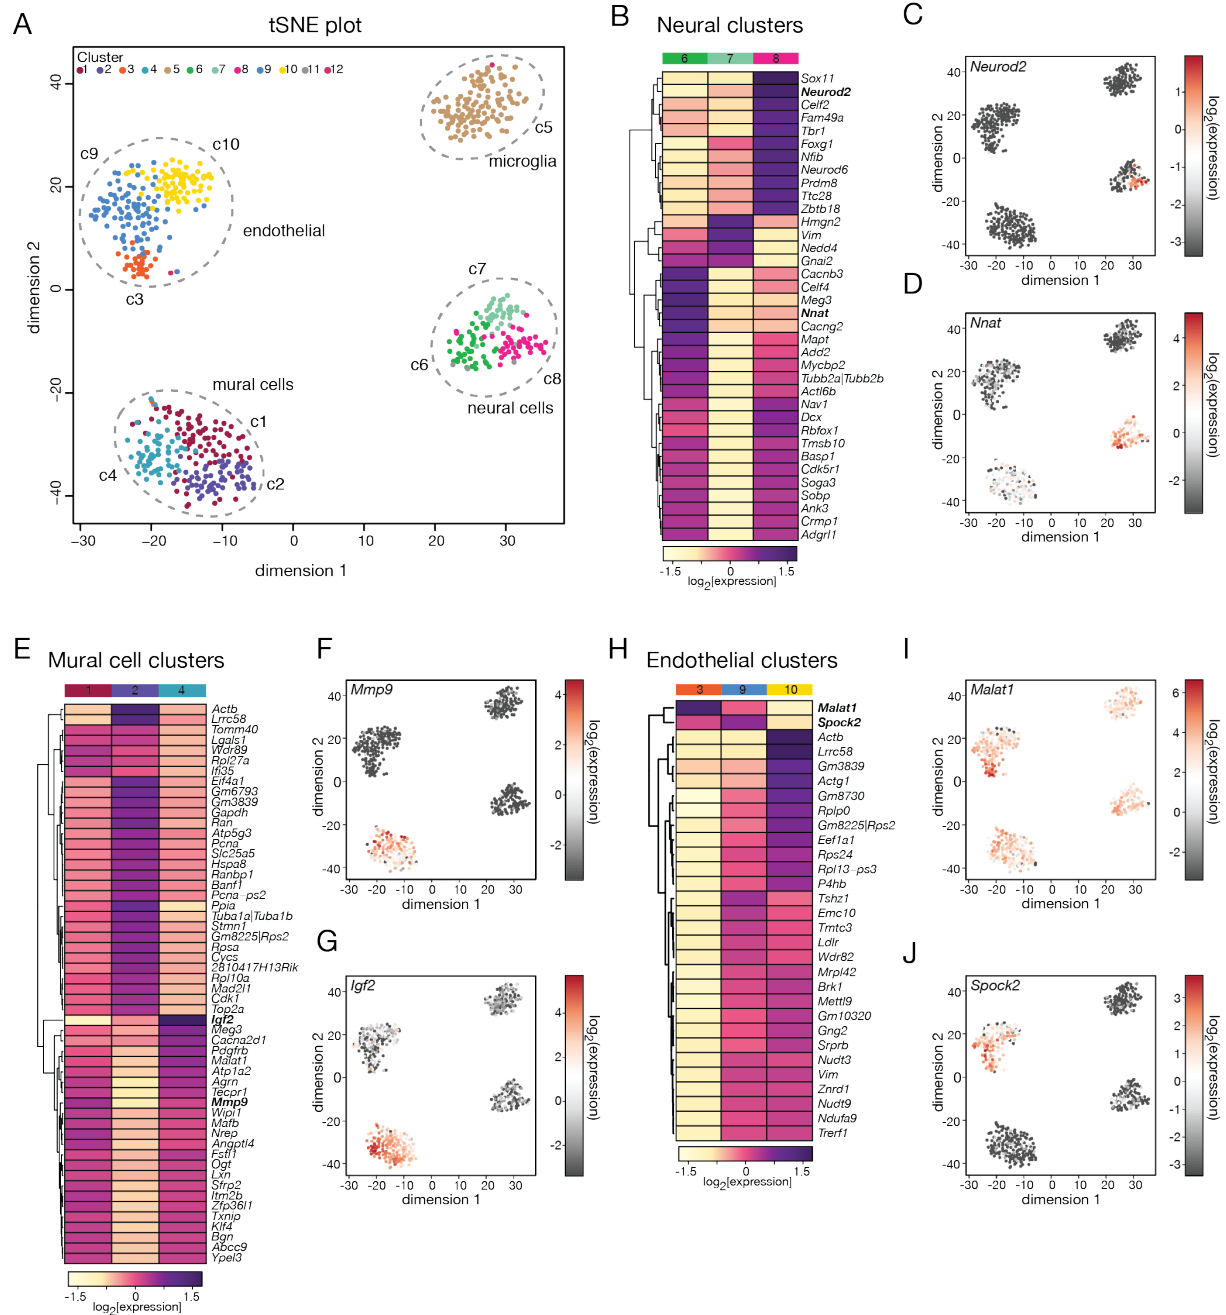

**Figure S2**

Comparison between subpopulations of neural cells, mural cells and endothelial cells.

Related to Figures 1 and 2

(A) An unbiased t-distributed stochastic neighbour embedding (tSNE) plot of all sorted cells, regardless of the cell surface marker used for their isolation, depicting 12 total clusters encompassing the four major cell populations: neural cells (clusters 6 to 8), mural cells (clusters 1, 2 and 4) endothelial cells (clusters 3, 9 and 10) and microglia (cluster 5). While each of the neural, mural and endothelial populations could be split into 3 three sub-clusters, only one cluster for microglia was evident. (B) Heatmap depicting differential gene expression between the three main sub-populations of the neural population. The  $\log_2(\text{normalised counts})$  value is provided for the top differentially expressed genes that display an enrichment score of more than 1. (C) tSNE plot showing *Neurod2* mRNA enrichment in differentiating neurons (cluster 8) compared to the stem / progenitor stem cell population (cluster 6). (D) tSNE plot showing enrichment of *Nnat* in cluster 6. (E) Heatmap depicting differential gene expression between the three sub-populations of mural cells isolated based on

PDGFR $\beta$  expression. The  $\log_2$ (normalised counts) value is provided for the top differentially expressed genes that display an absolute enrichment score of more than 0.6. **(F)** tSNE plot displaying expression of *Mmp9*, which is enriched in clusters 1 and 4, while lowly expressed in cluster 2. **(G)** tSNE plot of *Igf2* expression. *Igf2* shows strongest expression in cluster 4 and is significantly lower in clusters 1 and 2. **(H)** Heatmap depicting differential gene expression between the sub-populations of endothelial cells isolated based on PECAM1 and CD102 expression. The  $\log_2$ (normalised counts) value is provided for the top differentially expressed genes that display an absolute enrichment score of more than 1. **(I)** tSNE plot showing *Malat1* expression. While *Malat1* is widely expressed, it shows the highest gene expression in cluster 3 of endothelial cells. **(J)** tSNE plot showing gradient of *Spock2* gene expression.

The enrichment score was calculated by determining the expression of a particular gene in the given cell cluster relative to the mean expression of that same gene across all clusters.

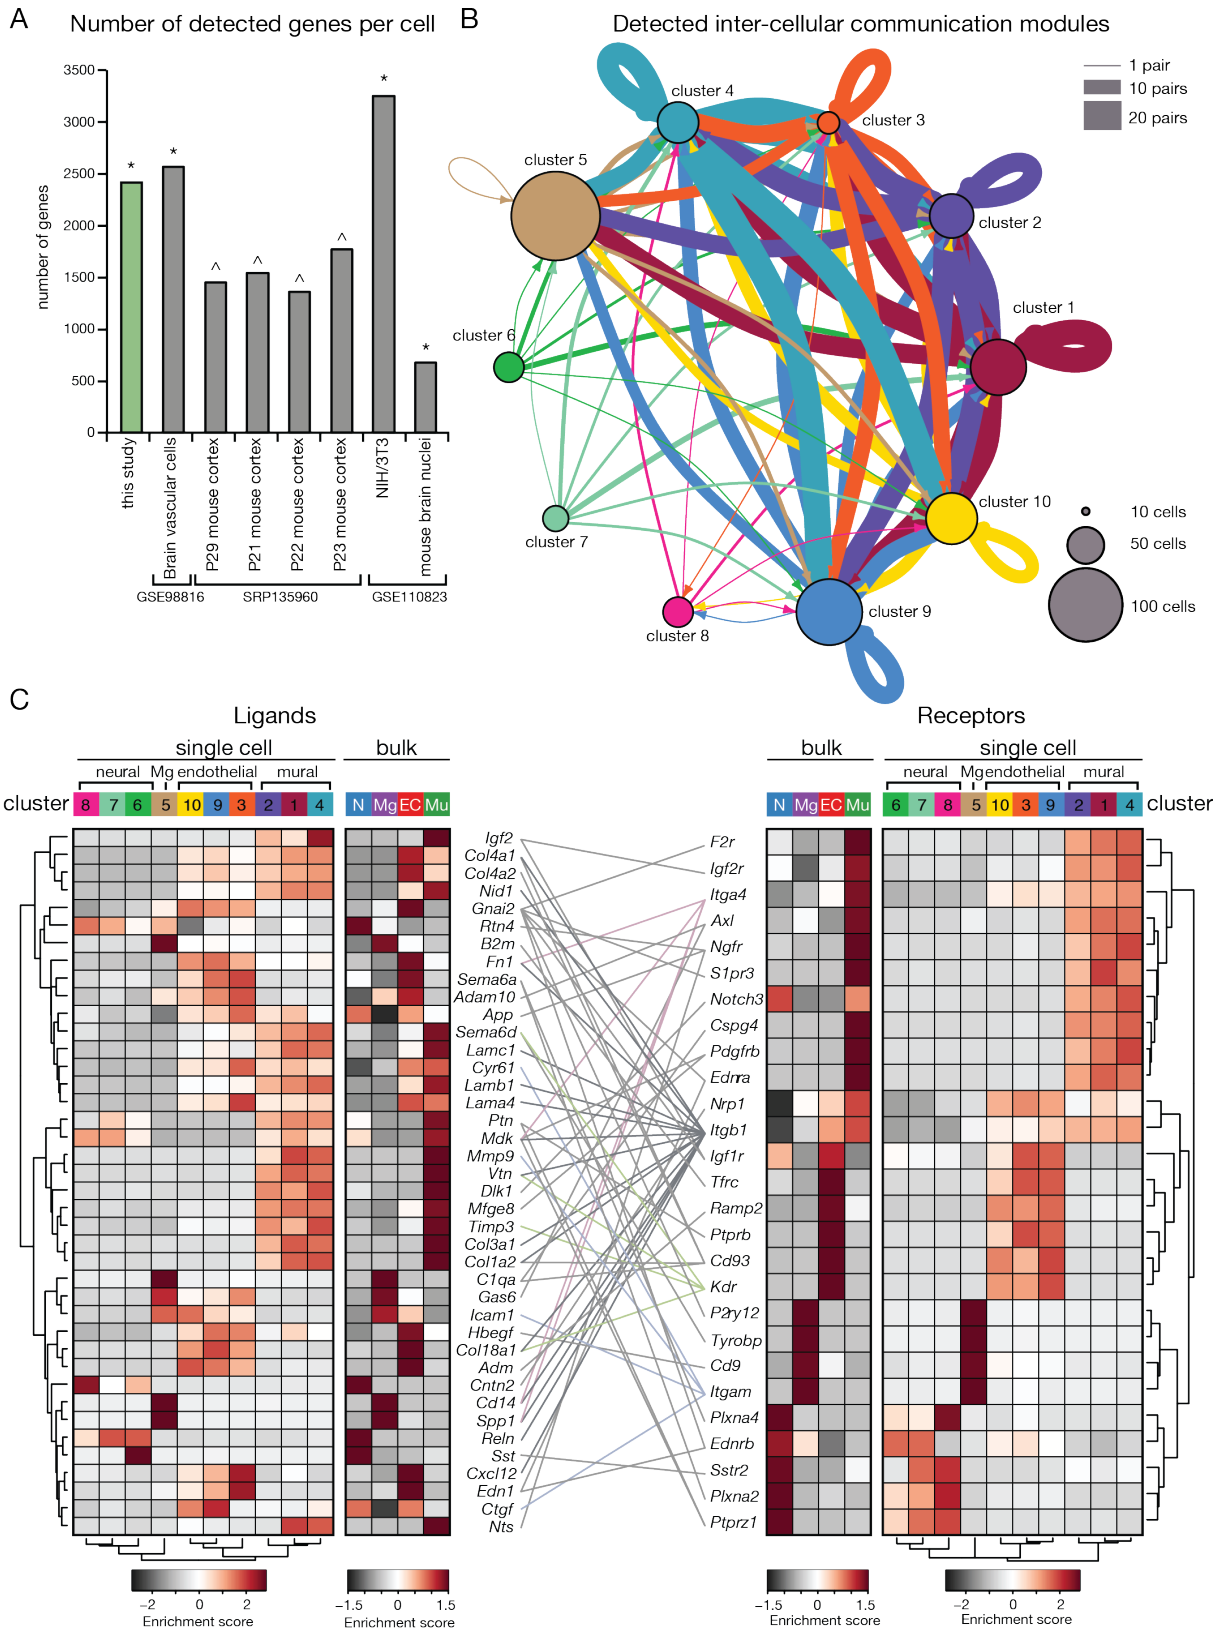

2018) and the GSE110823 dataset with (Rosenberg et al., 2018). \* indicate the mean number of genes detected per cell, while ^ represents the median number of genes detected per cell. Note that at greater, saturated sequencing depth (>500,000 reads per cell), Rosenberg et al. (2018) report a mean of 4497 detected genes per NIH/3T3 cell and 2055 genes per brain nucleus. **(B)** Inter-cellular interaction network of ligands and receptors between the 10 major clusters identified from the scRNA-seq data. A total of 80 ligands and 61 receptors were expressed in at least one cell cluster without taking into consideration the existence of the complete pair. 61 pairs encompassing 40 ligands and 27 receptors were detected in the whole database. The ligand – receptor interactions were based on the dataset curated by (Ramilowski et al., 2015). The thickness of lines connecting the respective clusters indicates the number of ligand – receptor interactions between the clusters. The size of the cluster circle represents the number of cells identified in the particular cluster. **(C)** Heatmaps showing the enrichment of ligands and receptors in each cluster of the scRNA-seq data as well as in bulk EMBRACE-isolated populations. Lines connecting ligand and receptor pairs depict the interaction between them.

The enrichment score was calculated for scRNA-seq data by determining the expression of a particular gene in the given cell cluster relative to the mean expression of that same gene across all clusters. For bulk RNA-seq analyses, the enrichment score was quantified by determining the expression of a particular gene in a specific cell type relative to the mean expression of that same gene across all 4 EMBRACE-isolated cell populations.

EC – endothelial cells, Mg – microglia, Mu – mural cells, N – neural cells

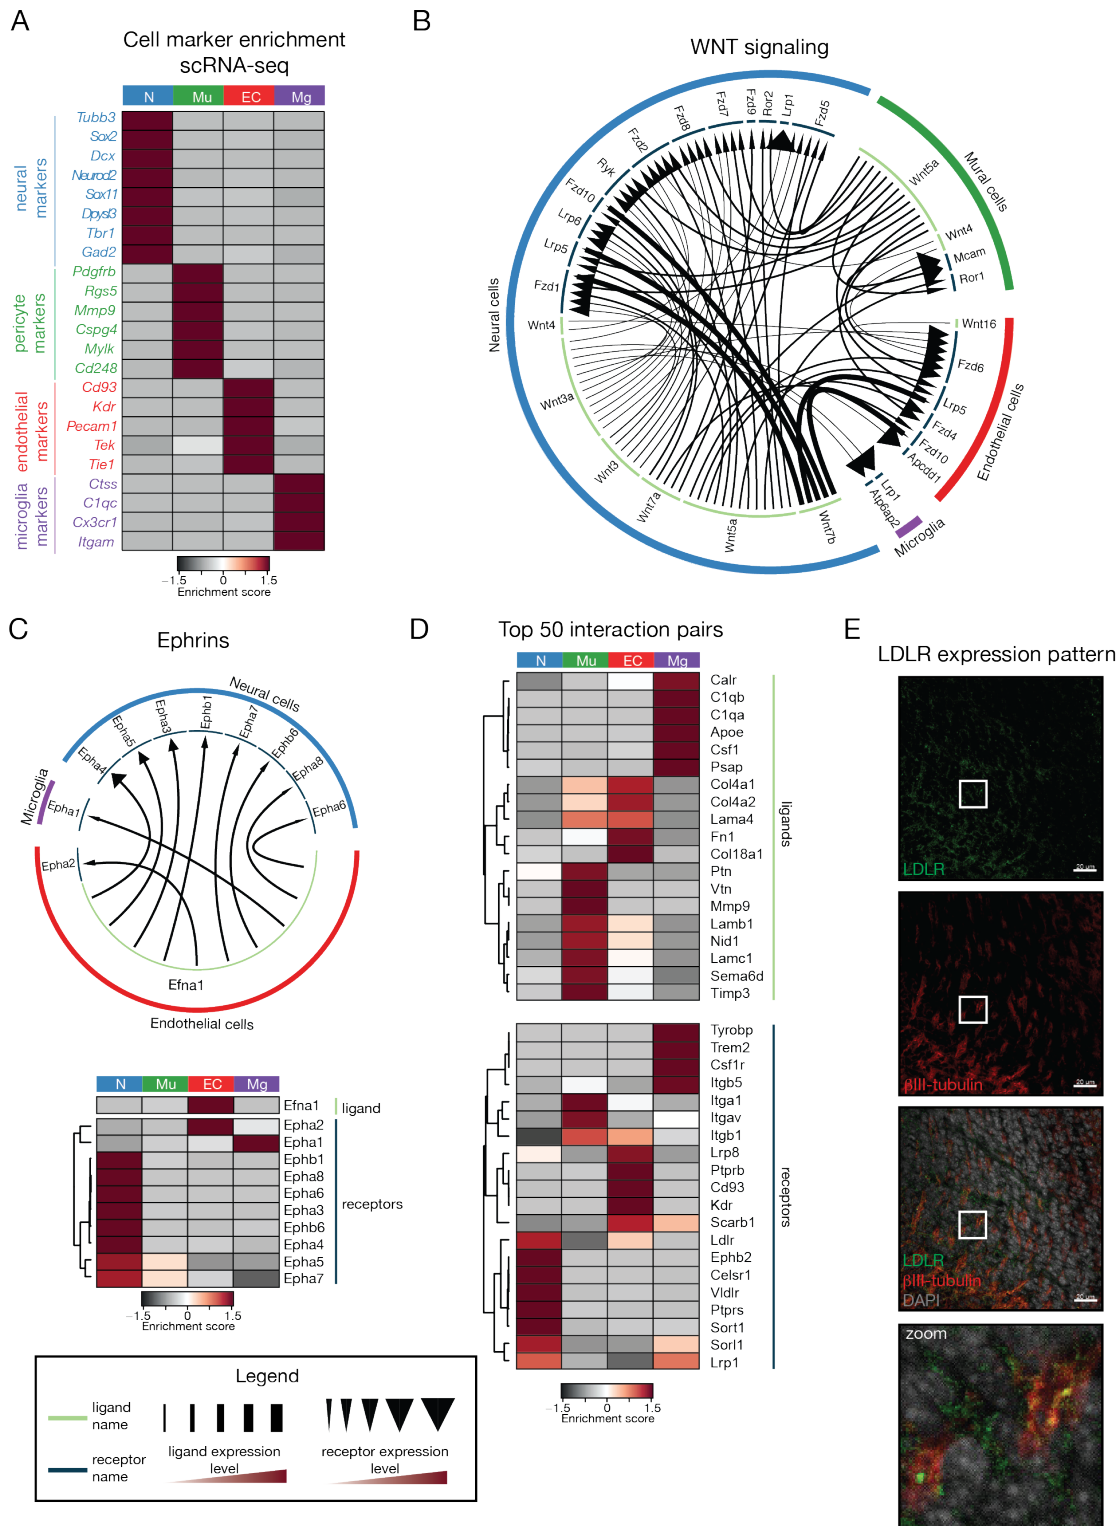

**Figure S4**

Key communication networks in neural, mural, endothelial and microglial cell populations  
 Related to Figures 4 and 5

**(A)** Enrichment of cell type markers in the scRNA-seq dataset for each cell type. **(B)** Interaction ligand - receptor map for WNT signaling based on transcriptomic analyses on bulk sorted populations. Note the high number of interactions involving neural cells. **(C)** Interaction map for Ephrin A1 (*Efna1*), which is highly enriched in endothelial cells, and its receptors, which are primarily expressed in neural cells. The heatmap displays enrichment in gene expression of Ephrin A1 and its receptors in the different



cell populations based on the enrichment score. **(D)** Heatmap based on the interaction map provided in Figure 4F. The heatmap displays gene expression of the 50 highest scoring ligand-receptor pairs bioinformatically mapped in the developing brain. The enrichment of each ligand and receptor is shown based on the enrichment score in neural, mural, endothelial and microglial cells. **(E)** Immunofluorescence images showing widespread expression of LDLR, especially in  $\beta$ III-tubulin positive neurons in the E14.5 brain. Scale bars indicate 20  $\mu$ m.

The enrichment score was calculated by determining the expression of a particular gene in a specific cell type relative to the mean expression of that same gene across all 4 EMBRACE-isolated cell populations.

EC – endothelial cells, Mg – microglia, Mu – mural cells, N – neural cells

**Table S1***Related to Figure 1*

Comparison of methods used for the dissociation of E14.5 brains. The scale spans “-” not detected, to “++++” present at highest levels. “Clumpiness” and “Digestion” were determined by the fraction of cells failing to pass through a 100  $\mu$ m filter after digestion. Ease of digestion was determined by the amount of manual pipetting required to dissociate the tissue until no obvious tissue clumps were visible.

|                                                    | No enzyme    | Collagenase<br>Dispase | Pancreatin<br>Trypsin | Liberase<br>only | Liberase +<br>Dnase I |
|----------------------------------------------------|--------------|------------------------|-----------------------|------------------|-----------------------|
| <b>Ease of dissociation</b>                        | ++++         | ++                     | ++++                  | +++              | +++                   |
| <b>Clumpiness</b>                                  | -            | ++                     | +++                   | ++               | -                     |
| <b>Digestion</b>                                   | ++++         | ++                     | +++                   | +++              | ++++                  |
| <b>Survival (%)*</b>                               | 17 $\pm$ 1.7 | 39.5 $\pm$ 2.2         | 55.9 $\pm$ 1.4        | 46.6 $\pm$ 2.6   | 67.8 $\pm$ 0.7        |
| <b>Median Fluorescence Intensity (MFI, PECAM1)</b> | 464          | 308                    | 94                    | 421              | not assessed          |

\* proportion of live FACS events as a proportion of total sorted events

**Table S2***Related to Figures 1 to 5*

List of antibodies used and their specificity. Antibodies shown in red were found to be specific and used in this study. Concentrations provided are for use in immunofluorescence. For Western Blot analysis, antibodies were used at 1:1000. For FACS, the secondary Alexa488-conjugated anti-goat IgG (A11055 ThermoFisher, 1:400) was used to detect the primary PDGFR $\beta$  (R+D systems) antibody.

| Antibody               | Code and Provider                | Concentration | Specific?           |
|------------------------|----------------------------------|---------------|---------------------|
| APOE                   | Polyclonal 178479 Merck          | 1:250         | Yes                 |
| $\beta$ -III tubulin   | clone 5G8 Promega                | 1:1000        | Yes                 |
| CD11b                  | clone M1/70 BD                   | 1:300         | Yes                 |
| CD13                   | clone EM15 eBioscience           | 1:100         | Yes, but low signal |
| CD41                   | clone MWReg30 BD                 | 1:200         | Yes                 |
| CD45                   | clone 30-F11 BD                  | 1:300         | Yes                 |
| IBA1                   | EPR16588 (ab178846) Abcam        | 1:1000        | Yes                 |
| ICAM2 (CD102)          | clone 3C4(miC2/4) BD             | 1:250         | Yes                 |
| KDR (FLK1, VEGFR2)     | clone D-8 (sc-393163) Santa Cruz | 1:200         | Yes                 |
| ITGB1                  | Polyclonal sc-8978 Santa Cruz    | 1:200         | Yes                 |
| LAMA4                  | CL3183 (ab242198) Abcam          | 1:200         | Yes                 |
| LDLR                   | EPY1553Y (ab52818) Abcam         | 1:250         | Yes                 |
| LRP1                   | EPR3724 (ab92544) Abcam          | 1:250         | Yes                 |
| NG2 (CSPG4)            | clone 9.2.27 BD                  | 1:100         | No                  |
| NG2 (CSPG4)            | Polyclonal AB5320 Millipore      | 1:100         | No                  |
| PDGFR $\beta$ (CD140b) | clone 28D4 BD                    | 1:200         | No                  |
| PDGFR $\beta$ (CD140b) | Polyclonal AF1042 R+D systems    | 1:200         | Yes                 |
| PECAM1 (CD31)          | clone 390 eBioscience            | 1:250         | Yes                 |
| PECAM1 (CD31)          | Polyclonal ab28364 Abcam         | 1:100         | Yes                 |
| VTN                    | EP873Y (ab45139) Abcam           | 1:200         | Yes                 |

**Table S3**

Related to Figure 2

List of genes most strongly enriched in neural clusters of the scRNA-seq dataset.

| Gene                 | base Mean | Base MeanA | Base MeanB | fold-enrichment | log2 [enrichment] | p value   | FDR       |
|----------------------|-----------|------------|------------|-----------------|-------------------|-----------|-----------|
| <i>Dpysl3</i>        | 1.19      | 0.13       | 2.24       | 17.68           | 4.14              | 6.70E-130 | 1.90E-126 |
| <i>Rtn1</i>          | 1.06      | 0.13       | 2.00       | 15.64           | 3.97              | 6.18E-112 | 1.50E-108 |
| <i>Tubb3</i>         | 0.91      | 0.11       | 1.71       | 15.46           | 3.95              | 4.31E-95  | 8.63E-92  |
| <i>Sox11</i>         | 4.10      | 0.54       | 7.65       | 14.16           | 3.82              | 0.00E+00  | 0.00E+00  |
| <i>Elavl3</i>        | 0.78      | 0.11       | 1.45       | 12.94           | 3.69              | 7.76E-76  | 1.15E-72  |
| <i>Stmn2</i>         | 0.83      | 0.12       | 1.54       | 12.83           | 3.68              | 9.97E-80  | 1.79E-76  |
| <i>Dcx</i>           | 0.67      | 0.10       | 1.23       | 11.68           | 3.55              | 6.39E-62  | 7.76E-59  |
| <i>Cd24a</i>         | 1.00      | 0.16       | 1.83       | 11.25           | 3.49              | 1.52E-90  | 2.88E-87  |
| <i>Nsg2</i>          | 0.64      | 0.11       | 1.17       | 10.86           | 3.44              | 2.16E-57  | 2.37E-54  |
| <i>Bcl11b</i>        | 0.59      | 0.11       | 1.07       | 9.55            | 3.26              | 2.85E-49  | 2.55E-46  |
| <i>Nnat</i>          | 3.53      | 0.68       | 6.38       | 9.38            | 3.23              | 0.00E+00  | 0.00E+00  |
| <i>Foxg1</i>         | 0.55      | 0.11       | 0.99       | 9.27            | 3.21              | 1.66E-45  | 1.31E-42  |
| <i>Elavl4</i>        | 0.58      | 0.12       | 1.05       | 9.14            | 3.19              | 9.49E-48  | 7.69E-45  |
| <i>Mapt</i>          | 0.60      | 0.12       | 1.09       | 9.05            | 3.18              | 9.61E-49  | 8.39E-46  |
| <i>Map1b</i>         | 2.02      | 0.41       | 3.62       | 8.86            | 3.15              | 5.05E-154 | 2.46E-150 |
| <i>Gpm6a</i>         | 0.54      | 0.12       | 0.97       | 8.39            | 3.07              | 8.14E-43  | 5.90E-40  |
| <i>Map2</i>          | 0.61      | 0.13       | 1.10       | 8.37            | 3.07              | 7.11E-48  | 5.90E-45  |
| <i>Gap43</i>         | 0.50      | 0.11       | 0.90       | 8.29            | 3.05              | 4.32E-39  | 2.59E-36  |
| <i>Sbk1</i>          | 0.51      | 0.11       | 0.90       | 8.22            | 3.04              | 1.25E-39  | 7.86E-37  |
| <i>Neurod6</i>       | 0.48      | 0.11       | 0.85       | 7.95            | 2.99              | 1.03E-35  | 5.33E-33  |
| <i>Igfbpl1</i>       | 0.46      | 0.10       | 0.81       | 7.85            | 2.97              | 7.63E-35  | 3.71E-32  |
| <i>Lhx2</i>          | 0.47      | 0.11       | 0.83       | 7.67            | 2.94              | 3.51E-35  | 1.79E-32  |
| <i>Meis2</i>         | 0.46      | 0.11       | 0.81       | 7.46            | 2.90              | 1.01E-32  | 4.28E-30  |
| <i>Pou3f3</i>        | 0.46      | 0.11       | 0.80       | 7.45            | 2.90              | 1.01E-32  | 4.28E-30  |
| <i>Sox2</i>          | 0.49      | 0.12       | 0.86       | 7.38            | 2.88              | 5.39E-35  | 2.66E-32  |
| <i>Kif5c</i>         | 0.44      | 0.11       | 0.78       | 7.30            | 2.87              | 1.67E-31  | 6.67E-29  |
| <i>Ina</i>           | 0.45      | 0.11       | 0.79       | 7.23            | 2.85              | 1.01E-32  | 4.28E-30  |
| <i>Nfib</i>          | 1.75      | 0.43       | 3.06       | 7.05            | 2.82              | 6.69E-117 | 1.75E-113 |
| <i>Elavl2</i>        | 0.43      | 0.11       | 0.76       | 6.90            | 2.79              | 3.89E-30  | 1.52E-27  |
| <i>Miat</i>          | 0.42      | 0.11       | 0.74       | 6.87            | 2.78              | 1.93E-29  | 7.11E-27  |
| <i>Dclk1</i>         | 0.42      | 0.11       | 0.73       | 6.85            | 2.78              | 2.03E-28  | 7.26E-26  |
| <i>Trim2</i>         | 0.43      | 0.11       | 0.76       | 6.84            | 2.77              | 8.27E-30  | 3.09E-27  |
| <i>Tubb2a Tubb2b</i> | 2.52      | 0.65       | 4.38       | 6.73            | 2.75              | 3.10E-147 | 1.32E-143 |
| <i>37865</i>         | 0.40      | 0.10       | 0.70       | 6.73            | 2.75              | 3.22E-27  | 1.10E-24  |
| <i>Pak3</i>          | 0.43      | 0.11       | 0.74       | 6.52            | 2.70              | 3.66E-28  | 1.30E-25  |
| <i>Bcl11a</i>        | 0.54      | 0.14       | 0.93       | 6.46            | 2.69              | 1.63E-34  | 7.81E-32  |
| <i>Runx1t1</i>       | 0.42      | 0.11       | 0.73       | 6.34            | 2.67              | 3.64E-27  | 1.22E-24  |
| <i>Neurod2</i>       | 0.38      | 0.10       | 0.65       | 6.29            | 2.65              | 5.11E-25  | 1.58E-22  |
| <i>Celf2</i>         | 1.19      | 0.33       | 2.05       | 6.22            | 2.64              | 4.27E-73  | 6.05E-70  |
| <i>Celf4</i>         | 0.39      | 0.11       | 0.68       | 6.21            | 2.64              | 4.23E-25  | 1.32E-22  |
| <i>Ank3</i>          | 0.41      | 0.11       | 0.70       | 6.19            | 2.63              | 5.56E-26  | 1.77E-23  |
| <i>Nfix</i>          | 0.48      | 0.13       | 0.82       | 6.12            | 2.61              | 4.36E-30  | 1.67E-27  |
| <i>Nsg1</i>          | 0.42      | 0.12       | 0.72       | 6.08            | 2.60              | 4.48E-26  | 1.44E-23  |
| <i>Gria2</i>         | 0.37      | 0.10       | 0.63       | 6.00            | 2.59              | 9.53E-23  | 2.64E-20  |
| <i>Cntn2</i>         | 0.40      | 0.12       | 0.69       | 5.89            | 2.56              | 6.65E-25  | 2.04E-22  |
| <i>Cdk5r1</i>        | 0.53      | 0.15       | 0.91       | 5.89            | 2.56              | 4.79E-32  | 1.94E-29  |
| <i>Dlx1</i>          | 0.36      | 0.11       | 0.61       | 5.81            | 2.54              | 8.88E-22  | 2.34E-19  |
| <i>Pbx1</i>          | 0.88      | 0.26       | 1.49       | 5.74            | 2.52              | 1.06E-50  | 1.06E-47  |
| <i>Crmp1</i>         | 0.57      | 0.17       | 0.97       | 5.67            | 2.50              | 7.08E-33  | 3.13E-30  |
| <i>Stmn1</i>         | 2.63      | 0.80       | 4.47       | 5.61            | 2.49              | 4.57E-130 | 1.41E-126 |
| <i>Basp1</i>         | 2.11      | 0.64       | 3.58       | 5.58            | 2.48              | 1.24E-111 | 2.81E-108 |
| <i>Tagln3</i>        | 0.47      | 0.15       | 0.79       | 5.38            | 2.43              | 3.24E-26  | 1.05E-23  |
| <i>Soga3</i>         | 0.37      | 0.12       | 0.63       | 5.32            | 2.41              | 7.89E-21  | 1.99E-18  |
| <i>Kif21a</i>        | 0.37      | 0.12       | 0.62       | 5.23            | 2.39              | 2.29E-20  | 5.49E-18  |
| <i>Fez1</i>          | 0.34      | 0.11       | 0.57       | 5.21            | 2.38              | 4.40E-19  | 9.72E-17  |
| <i>St8sia2</i>       | 0.35      | 0.11       | 0.59       | 5.20            | 2.38              | 2.74E-19  | 6.22E-17  |
| <i>Epha4</i>         | 0.39      | 0.13       | 0.65       | 4.92            | 2.30              | 1.09E-20  | 2.68E-18  |
| <i>6330403K07Rik</i> | 0.35      | 0.12       | 0.58       | 4.89            | 2.29              | 4.30E-18  | 9.04E-16  |
| <i>Insm1</i>         | 0.30      | 0.10       | 0.50       | 4.88            | 2.29              | 5.62E-16  | 9.75E-14  |
| <i>Zfp462</i>        | 0.46      | 0.16       | 0.76       | 4.87            | 2.28              | 7.83E-24  | 2.28E-21  |
| <i>Pfn2</i>          | 0.44      | 0.15       | 0.74       | 4.82            | 2.27              | 1.60E-22  | 4.33E-20  |
| <i>Rnd2</i>          | 0.32      | 0.11       | 0.53       | 4.82            | 2.27              | 4.73E-17  | 8.99E-15  |
| <i>Mlit11</i>        | 0.38      | 0.13       | 0.62       | 4.77            | 2.25              | 6.73E-19  | 1.47E-16  |
| <i>Neurog2</i>       | 0.30      | 0.10       | 0.50       | 4.74            | 2.24              | 2.70E-15  | 4.38E-13  |
| <i>Kif1a</i>         | 0.30      | 0.11       | 0.49       | 4.59            | 2.20              | 1.25E-14  | 1.88E-12  |
| <i>Gng3</i>          | 0.31      | 0.11       | 0.51       | 4.59            | 2.20              | 4.76E-15  | 7.43E-13  |
| <i>Mpped2</i>        | 0.35      | 0.13       | 0.57       | 4.57            | 2.19              | 2.17E-17  | 4.22E-15  |
| <i>Pantr1</i>        | 0.31      | 0.11       | 0.51       | 4.55            | 2.19              | 1.74E-15  | 2.88E-13  |
| <i>Gm3764</i>        | 0.30      | 0.11       | 0.49       | 4.55            | 2.19              | 1.25E-14  | 1.88E-12  |
| <i>Tmeff1</i>        | 0.32      | 0.12       | 0.52       | 4.54            | 2.18              | 6.64E-16  | 1.14E-13  |
| <i>Dpysl5</i>        | 0.29      | 0.11       | 0.47       | 4.49            | 2.17              | 2.03E-14  | 2.98E-12  |
| <i>Tbr1</i>          | 0.28      | 0.10       | 0.46       | 4.48            | 2.16              | 8.96E-14  | 1.24E-11  |
| <i>Ppp2r2b</i>       | 0.28      | 0.10       | 0.46       | 4.45            | 2.15              | 8.96E-14  | 1.24E-11  |
| <i>Neurod1</i>       | 0.27      | 0.10       | 0.45       | 4.38            | 2.13              | 1.46E-13  | 1.97E-11  |

|                      |      |      |      |      |      |          |          |
|----------------------|------|------|------|------|------|----------|----------|
| <i>Plxna2</i>        | 0.37 | 0.14 | 0.60 | 4.34 | 2.12 | 1.47E-17 | 2.92E-15 |
| <i>Cnih2</i>         | 0.30 | 0.11 | 0.49 | 4.32 | 2.11 | 3.49E-14 | 4.99E-12 |
| <i>Bex2</i>          | 0.28 | 0.11 | 0.45 | 4.31 | 2.11 | 1.48E-13 | 2.00E-11 |
| <i>Pou3f2</i>        | 0.30 | 0.11 | 0.48 | 4.31 | 2.11 | 3.46E-14 | 4.97E-12 |
| <i>Zbtb18</i>        | 0.43 | 0.17 | 0.70 | 4.22 | 2.08 | 3.14E-19 | 7.03E-17 |
| <i>Myt1l</i>         | 0.26 | 0.10 | 0.42 | 4.22 | 2.08 | 2.77E-12 | 3.42E-10 |
| <i>Mir124-2hg</i>    | 0.27 | 0.10 | 0.43 | 4.20 | 2.07 | 1.70E-12 | 2.14E-10 |
| <i>Camta1</i>        | 0.31 | 0.12 | 0.50 | 4.20 | 2.07 | 1.32E-14 | 1.97E-12 |
| <i>Sox5</i>          | 0.32 | 0.12 | 0.51 | 4.14 | 2.05 | 3.46E-14 | 4.97E-12 |
| <i>Mex3a</i>         | 0.58 | 0.23 | 0.93 | 4.04 | 2.02 | 1.15E-23 | 3.31E-21 |
| <i>Ndn</i>           | 0.50 | 0.20 | 0.80 | 4.04 | 2.01 | 9.95E-21 | 2.47E-18 |
| <i>Setbp1</i>        | 0.38 | 0.15 | 0.61 | 4.02 | 2.01 | 2.63E-16 | 4.66E-14 |
| <i>Ttc3</i>          | 1.47 | 0.59 | 2.36 | 4.02 | 2.01 | 4.41E-58 | 5.01E-55 |
| <i>Stmn3</i>         | 0.27 | 0.11 | 0.43 | 4.02 | 2.01 | 4.37E-12 | 5.29E-10 |
| <i>Ptprz1</i>        | 0.29 | 0.12 | 0.46 | 4.00 | 2.00 | 2.52E-12 | 3.14E-10 |
| <i>Srgap3</i>        | 0.27 | 0.11 | 0.43 | 3.99 | 2.00 | 1.76E-11 | 2.06E-09 |
| <i>Sox4</i>          | 1.52 | 0.61 | 2.43 | 3.98 | 1.99 | 3.68E-59 | 4.32E-56 |
| <i>Cxadr</i>         | 0.25 | 0.10 | 0.41 | 3.96 | 1.99 | 7.55E-11 | 8.10E-09 |
| <i>Hdgfrp3</i>       | 0.33 | 0.13 | 0.52 | 3.92 | 1.97 | 1.33E-13 | 1.80E-11 |
| <i>Stmn4</i>         | 0.26 | 0.10 | 0.41 | 3.91 | 1.97 | 4.64E-11 | 5.13E-09 |
| <i>Fezf2</i>         | 0.26 | 0.11 | 0.42 | 3.91 | 1.97 | 2.86E-11 | 3.25E-09 |
| <i>Rufy3</i>         | 0.37 | 0.15 | 0.58 | 3.90 | 1.96 | 4.33E-15 | 6.86E-13 |
| <i>Ptbp2</i>         | 0.37 | 0.15 | 0.59 | 3.89 | 1.96 | 1.71E-15 | 2.85E-13 |
| <i>Epha5</i>         | 0.34 | 0.14 | 0.55 | 3.88 | 1.95 | 1.92E-14 | 2.83E-12 |
| <i>2610203C20Rik</i> | 0.26 | 0.11 | 0.41 | 3.85 | 1.94 | 7.20E-11 | 7.80E-09 |
| <i>Gnao1</i>         | 0.32 | 0.13 | 0.51 | 3.83 | 1.94 | 3.34E-13 | 4.41E-11 |

**Table S4**

Related to Figure 2

List of genes most strongly enriched in mural cell clusters of the scRNA-seq dataset.

| Gene                 | Base Mean | Base MeanA | Base MeanB | fold-enrichment | log2 [enrichment] | p value   | FDR       |
|----------------------|-----------|------------|------------|-----------------|-------------------|-----------|-----------|
| <i>Rgs5</i>          | 7.38      | 0.28       | 14.49      | 52.50           | 5.71              | 0.00E+00  | 0.00E+00  |
| <i>Mmp9</i>          | 2.34      | 0.14       | 4.54       | 33.12           | 5.05              | 0.00E+00  | 0.00E+00  |
| <i>Vtn</i>           | 2.02      | 0.15       | 3.90       | 26.66           | 4.74              | 0.00E+00  | 0.00E+00  |
| <i>Igf2</i>          | 7.50      | 0.65       | 14.34      | 21.97           | 4.46              | 0.00E+00  | 0.00E+00  |
| <i>Atp1a2</i>        | 1.61      | 0.15       | 3.07       | 20.34           | 4.35              | 2.63E-222 | 1.49E-218 |
| <i>Abcc9</i>         | 1.54      | 0.15       | 2.93       | 19.04           | 4.25              | 1.27E-207 | 6.16E-204 |
| <i>Cd248</i>         | 0.85      | 0.11       | 1.58       | 13.84           | 3.79              | 2.42E-103 | 6.35E-100 |
| <i>Cald1</i>         | 2.30      | 0.32       | 4.28       | 13.38           | 3.74              | 6.53E-255 | 4.45E-251 |
| <i>Kcnj8</i>         | 0.77      | 0.11       | 1.43       | 12.87           | 3.69              | 1.50E-91  | 2.83E-88  |
| <i>Pcdh18</i>        | 1.06      | 0.15       | 1.97       | 12.86           | 3.69              | 1.26E-125 | 4.28E-122 |
| <i>Myl9</i>          | 0.88      | 0.13       | 1.64       | 12.33           | 3.62              | 7.53E-103 | 1.83E-99  |
| <i>Cspg4</i>         | 0.75      | 0.11       | 1.38       | 12.29           | 3.62              | 1.74E-86  | 2.58E-83  |
| <i>Pdgfrb</i>        | 0.68      | 0.11       | 1.25       | 11.75           | 3.55              | 1.89E-77  | 2.39E-74  |
| <i>Myik</i>          | 0.82      | 0.14       | 1.49       | 10.29           | 3.36              | 5.20E-87  | 8.05E-84  |
| <i>Heyl</i>          | 0.58      | 0.11       | 1.05       | 9.67            | 3.27              | 4.27E-60  | 3.54E-57  |
| <i>Gjc1</i>          | 0.96      | 0.19       | 1.74       | 9.29            | 3.22              | 4.00E-97  | 8.01E-94  |
| <i>Ednra</i>         | 0.56      | 0.11       | 1.01       | 9.05            | 3.18              | 1.31E-56  | 9.90E-54  |
| <i>Dlk1</i>          | 0.74      | 0.15       | 1.32       | 9.04            | 3.18              | 6.24E-74  | 6.85E-71  |
| <i>Col3a1</i>        | 0.56      | 0.11       | 1.00       | 8.86            | 3.15              | 3.04E-55  | 2.25E-52  |
| <i>Rgs4</i>          | 0.65      | 0.13       | 1.17       | 8.79            | 3.14              | 3.81E-64  | 3.51E-61  |
| <i>Ndufa4l2</i>      | 0.49      | 0.11       | 0.86       | 7.97            | 2.99              | 3.31E-45  | 1.94E-42  |
| <i>Notch3</i>        | 0.54      | 0.12       | 0.97       | 7.90            | 2.98              | 9.65E-51  | 6.57E-48  |
| <i>F2r</i>           | 0.87      | 0.21       | 1.53       | 7.32            | 2.87              | 2.35E-75  | 2.76E-72  |
| <i>Fstl1</i>         | 1.46      | 0.35       | 2.57       | 7.29            | 2.87              | 3.29E-125 | 1.02E-121 |
| <i>Col1a2</i>        | 0.43      | 0.11       | 0.76       | 7.08            | 2.82              | 4.32E-38  | 2.02E-35  |
| <i>Gucy1b3</i>       | 0.45      | 0.11       | 0.79       | 7.05            | 2.82              | 1.54E-39  | 7.59E-37  |
| <i>Gucy1a3</i>       | 0.45      | 0.11       | 0.79       | 6.95            | 2.80              | 1.08E-38  | 5.11E-36  |
| <i>Atp1b2</i>        | 0.51      | 0.14       | 0.89       | 6.54            | 2.71              | 4.68E-42  | 2.53E-39  |
| <i>40787</i>         | 1.33      | 0.36       | 2.30       | 6.46            | 2.69              | 1.11E-105 | 3.16E-102 |
| <i>Ngfr</i>          | 0.43      | 0.12       | 0.73       | 6.25            | 2.64              | 5.67E-34  | 2.33E-31  |
| <i>S1pr3</i>         | 0.38      | 0.10       | 0.65       | 6.22            | 2.64              | 5.22E-30  | 1.76E-27  |
| <i>Zic1</i>          | 0.91      | 0.26       | 1.57       | 6.12            | 2.61              | 4.22E-70  | 4.11E-67  |
| <i>Meg3</i>          | 1.97      | 0.57       | 3.37       | 5.95            | 2.57              | 1.55E-141 | 5.86E-138 |
| <i>Sdc2</i>          | 0.38      | 0.11       | 0.65       | 5.77            | 2.53              | 2.08E-28  | 6.80E-26  |
| <i>Mfge8</i>         | 0.66      | 0.20       | 1.12       | 5.63            | 2.49              | 1.32E-47  | 8.50E-45  |
| <i>Farp1</i>         | 0.45      | 0.14       | 0.76       | 5.54            | 2.47              | 1.38E-32  | 5.15E-30  |
| <i>Axl</i>           | 0.48      | 0.15       | 0.81       | 5.36            | 2.42              | 1.52E-33  | 6.10E-31  |
| <i>Gm13889</i>       | 0.46      | 0.15       | 0.78       | 5.32            | 2.41              | 3.73E-32  | 1.35E-29  |
| <i>Gper1</i>         | 0.33      | 0.11       | 0.54       | 4.98            | 2.31              | 6.98E-22  | 1.77E-19  |
| <i>Uaca</i>          | 0.51      | 0.17       | 0.84       | 4.93            | 2.30              | 5.82E-33  | 2.20E-30  |
| <i>S100a11</i>       | 0.57      | 0.19       | 0.95       | 4.92            | 2.30              | 4.23E-37  | 1.89E-34  |
| <i>Tbxa2r</i>        | 0.35      | 0.12       | 0.57       | 4.87            | 2.28              | 1.75E-22  | 4.59E-20  |
| <i>Mmp11</i>         | 0.30      | 0.10       | 0.50       | 4.85            | 2.28              | 3.91E-20  | 9.30E-18  |
| <i>Pde8b</i>         | 0.32      | 0.11       | 0.54       | 4.84            | 2.27              | 5.11E-21  | 1.27E-18  |
| <i>Lhfp</i>          | 0.36      | 0.12       | 0.59       | 4.81            | 2.27              | 6.04E-23  | 1.60E-20  |
| <i>Foxd1</i>         | 0.30      | 0.10       | 0.49       | 4.72            | 2.24              | 2.82E-19  | 6.27E-17  |
| <i>38231</i>         | 0.45      | 0.16       | 0.73       | 4.67            | 2.22              | 1.11E-27  | 3.48E-25  |
| <i>Pde5a</i>         | 0.37      | 0.13       | 0.60       | 4.54            | 2.18              | 1.18E-22  | 3.12E-20  |
| <i>Tppp3</i>         | 0.36      | 0.13       | 0.58       | 4.48            | 2.16              | 5.71E-22  | 1.46E-19  |
| <i>Hspa1a Hspa1b</i> | 0.89      | 0.33       | 1.45       | 4.42            | 2.14              | 1.01E-50  | 6.73E-48  |
| <i>Bgn</i>           | 1.44      | 0.54       | 2.35       | 4.32            | 2.11              | 3.44E-79  | 4.51E-76  |
| <i>39326</i>         | 1.39      | 0.52       | 2.26       | 4.31            | 2.11              | 6.70E-76  | 8.15E-73  |
| <i>Akap12</i>        | 0.61      | 0.23       | 1.00       | 4.31            | 2.11              | 2.67E-34  | 1.11E-31  |
| <i>Rian</i>          | 0.50      | 0.19       | 0.81       | 4.25            | 2.09              | 7.17E-28  | 2.30E-25  |
| <i>Trpc3</i>         | 0.28      | 0.11       | 0.46       | 4.24            | 2.08              | 1.95E-16  | 3.71E-14  |
| <i>Plce1</i>         | 0.29      | 0.11       | 0.47       | 4.22            | 2.08              | 4.05E-17  | 8.01E-15  |
| <i>Mcam</i>          | 0.82      | 0.31       | 1.32       | 4.22            | 2.08              | 1.35E-44  | 7.64E-42  |
| <i>Gnas</i>          | 0.85      | 0.33       | 1.38       | 4.20            | 2.07              | 1.40E-45  | 8.34E-43  |
| <i>Phlda1</i>        | 0.75      | 0.29       | 1.20       | 4.18            | 2.06              | 5.02E-40  | 2.59E-37  |
| <i>Gadd45b</i>       | 0.43      | 0.17       | 0.69       | 4.11            | 2.04              | 5.73E-23  | 1.54E-20  |
| <i>Tbx2</i>          | 0.29      | 0.11       | 0.46       | 4.10            | 2.04              | 3.97E-16  | 7.30E-14  |
| <i>Lamb1</i>         | 0.90      | 0.36       | 1.44       | 4.06            | 2.02              | 1.83E-46  | 1.16E-43  |
| <i>Fos</i>           | 1.75      | 0.69       | 2.81       | 4.06            | 2.02              | 1.83E-88  | 2.96E-85  |
| <i>Arhgap42</i>      | 0.31      | 0.13       | 0.50       | 3.99            | 2.00              | 3.38E-17  | 6.73E-15  |
| <i>Arhgef17</i>      | 0.30      | 0.12       | 0.47       | 3.96            | 1.99              | 1.33E-15  | 2.40E-13  |
| <i>Gprc5c</i>        | 0.25      | 0.10       | 0.40       | 3.96            | 1.98              | 1.10E-13  | 1.75E-11  |
| <i>Nid1</i>          | 1.74      | 0.71       | 2.76       | 3.92            | 1.97              | 6.49E-84  | 9.21E-81  |
| <i>Ifitm3</i>        | 0.35      | 0.14       | 0.56       | 3.87            | 1.95              | 3.05E-18  | 6.41E-16  |
| <i>Ptn</i>           | 0.64      | 0.26       | 1.02       | 3.87            | 1.95              | 1.22E-31  | 4.32E-29  |
| <i>Higd1b</i>        | 0.25      | 0.10       | 0.40       | 3.85            | 1.95              | 3.14E-13  | 4.82E-11  |
| <i>Eva1b</i>         | 0.51      | 0.21       | 0.81       | 3.82            | 1.93              | 6.24E-25  | 1.82E-22  |
| <i>Tns1</i>          | 0.42      | 0.17       | 0.66       | 3.80            | 1.93              | 1.89E-20  | 4.55E-18  |
| <i>Epb41l1</i>       | 0.31      | 0.13       | 0.49       | 3.77            | 1.92              | 4.84E-16  | 8.87E-14  |
| <i>Lgals1</i>        | 0.35      | 0.15       | 0.55       | 3.76            | 1.91              | 1.37E-17  | 2.82E-15  |

|                 |      |      |      |      |      |          |          |
|-----------------|------|------|------|------|------|----------|----------|
| <i>Cdh11</i>    | 0.39 | 0.17 | 0.62 | 3.73 | 1.90 | 7.87E-19 | 1.70E-16 |
| <i>Tnfrsf21</i> | 0.48 | 0.20 | 0.76 | 3.72 | 1.90 | 2.12E-23 | 5.87E-21 |
| <i>Igf2r</i>    | 0.51 | 0.22 | 0.80 | 3.66 | 1.87 | 5.83E-24 | 1.65E-21 |
| <i>Ebf1</i>     | 0.79 | 0.34 | 1.24 | 3.65 | 1.87 | 3.94E-36 | 1.72E-33 |
| <i>Gstk1</i>    | 0.25 | 0.11 | 0.40 | 3.63 | 1.86 | 6.71E-13 | 1.01E-10 |
| <i>Afap1l2</i>  | 0.25 | 0.11 | 0.40 | 3.63 | 1.86 | 2.12E-12 | 3.03E-10 |
| <i>Atp7a</i>    | 0.45 | 0.20 | 0.71 | 3.58 | 1.84 | 7.43E-21 | 1.83E-18 |
| <i>Pdlim2</i>   | 0.26 | 0.11 | 0.40 | 3.58 | 1.84 | 4.38E-12 | 6.18E-10 |
| <i>Spry4</i>    | 0.26 | 0.11 | 0.40 | 3.55 | 1.83 | 2.30E-12 | 3.27E-10 |
| <i>Adap2</i>    | 0.33 | 0.15 | 0.52 | 3.53 | 1.82 | 2.38E-15 | 4.22E-13 |
| <i>Sema6d</i>   | 1.00 | 0.44 | 1.56 | 3.53 | 1.82 | 2.05E-43 | 1.14E-40 |
| <i>Dmd</i>      | 0.26 | 0.11 | 0.41 | 3.53 | 1.82 | 1.92E-12 | 2.77E-10 |
| <i>Col5a1</i>   | 0.25 | 0.11 | 0.39 | 3.51 | 1.81 | 1.00E-11 | 1.36E-09 |
| <i>Oaz2</i>     | 0.71 | 0.31 | 1.10 | 3.51 | 1.81 | 8.33E-31 | 2.92E-28 |
| <i>Timp3</i>    | 0.45 | 0.20 | 0.70 | 3.49 | 1.80 | 1.63E-20 | 3.99E-18 |
| <i>Sfrp2</i>    | 0.25 | 0.11 | 0.38 | 3.46 | 1.79 | 1.00E-11 | 1.36E-09 |
| <i>Zfp703</i>   | 0.44 | 0.20 | 0.68 | 3.46 | 1.79 | 1.57E-19 | 3.56E-17 |
| <i>Pid1</i>     | 0.35 | 0.16 | 0.54 | 3.45 | 1.79 | 2.50E-15 | 4.40E-13 |
| <i>Hic1</i>     | 0.29 | 0.13 | 0.44 | 3.45 | 1.79 | 6.07E-13 | 9.22E-11 |
| <i>Tlr12</i>    | 0.27 | 0.12 | 0.42 | 3.45 | 1.79 | 1.43E-12 | 2.09E-10 |
| <i>Tbx18</i>    | 0.23 | 0.10 | 0.35 | 3.41 | 1.77 | 2.24E-10 | 2.66E-08 |
| <i>Car4</i>     | 0.23 | 0.10 | 0.36 | 3.41 | 1.77 | 6.54E-11 | 8.15E-09 |
| <i>Rasl12</i>   | 0.23 | 0.11 | 0.36 | 3.41 | 1.77 | 9.84E-11 | 1.19E-08 |
| <i>Lamc3</i>    | 0.23 | 0.11 | 0.36 | 3.39 | 1.76 | 9.84E-11 | 1.19E-08 |
| <i>Slc19a1</i>  | 0.24 | 0.11 | 0.37 | 3.34 | 1.74 | 7.09E-11 | 8.81E-09 |
| <i>Myh9</i>     | 0.76 | 0.35 | 1.16 | 3.31 | 1.73 | 1.87E-30 | 6.48E-28 |

**Table S5**

Related to Figure 2

List of genes most strongly enriched in endothelial clusters of the scRNA-seq dataset.

| Gene            | Base Mean | Base MeanA | Base MeanB | fold-enrichment | log2 [enrichment] | p value   | FDR       |
|-----------------|-----------|------------|------------|-----------------|-------------------|-----------|-----------|
| <i>Cldn5</i>    | 1.73      | 0.12       | 3.35       | 28.42           | 4.83              | 5.81E-260 | 9.88E-256 |
| <i>Kdr</i>      | 1.73      | 0.13       | 3.32       | 25.30           | 4.66              | 6.89E-252 | 7.81E-248 |
| <i>Cd93</i>     | 1.62      | 0.13       | 3.11       | 24.54           | 4.62              | 1.48E-234 | 1.26E-230 |
| <i>Spock2</i>   | 1.45      | 0.16       | 2.74       | 17.58           | 4.14              | 1.13E-189 | 5.50E-186 |
| <i>Flt1</i>     | 1.50      | 0.16       | 2.83       | 17.28           | 4.11              | 1.28E-196 | 7.26E-193 |
| <i>Slc2a1</i>   | 1.52      | 0.19       | 2.84       | 15.07           | 3.91              | 2.55E-189 | 1.08E-185 |
| <i>Vwa1</i>     | 0.84      | 0.12       | 1.57       | 12.92           | 3.69              | 3.23E-99  | 7.33E-96  |
| <i>Slc7a5</i>   | 1.38      | 0.21       | 2.55       | 11.86           | 3.57              | 9.76E-157 | 3.32E-153 |
| <i>Slc38a5</i>  | 0.67      | 0.11       | 1.24       | 11.15           | 3.48              | 5.20E-75  | 7.08E-72  |
| <i>Ptpnb</i>    | 0.71      | 0.12       | 1.29       | 10.78           | 3.43              | 5.98E-77  | 8.85E-74  |
| <i>Egfl7</i>    | 0.76      | 0.13       | 1.38       | 10.76           | 3.43              | 2.26E-82  | 4.05E-79  |
| <i>Slc7a1</i>   | 1.87      | 0.32       | 3.42       | 10.63           | 3.41              | 2.80E-199 | 1.91E-195 |
| <i>Tie1</i>     | 0.71      | 0.13       | 1.29       | 9.80            | 3.29              | 1.78E-74  | 2.25E-71  |
| <i>Pecam1</i>   | 0.63      | 0.12       | 1.15       | 9.76            | 3.29              | 6.48E-66  | 7.12E-63  |
| <i>Mfsd2a</i>   | 0.54      | 0.11       | 0.96       | 8.68            | 3.12              | 8.71E-53  | 6.89E-50  |
| <i>Mmrn2</i>    | 0.55      | 0.12       | 0.98       | 8.49            | 3.09              | 5.38E-53  | 4.36E-50  |
| <i>Slc38a3</i>  | 0.51      | 0.11       | 0.90       | 8.34            | 3.06              | 2.50E-48  | 1.70E-45  |
| <i>Htra3</i>    | 0.51      | 0.11       | 0.91       | 7.95            | 2.99              | 1.18E-47  | 7.90E-45  |
| <i>Cd34</i>     | 0.61      | 0.14       | 1.09       | 7.95            | 2.99              | 1.32E-56  | 1.25E-53  |
| <i>Cdh5</i>     | 0.44      | 0.11       | 0.78       | 7.26            | 2.86              | 1.83E-39  | 1.01E-36  |
| <i>Nos3</i>     | 0.41      | 0.10       | 0.72       | 6.84            | 2.77              | 1.04E-34  | 4.65E-32  |
| <i>Adgrl4</i>   | 0.43      | 0.11       | 0.74       | 6.77            | 2.76              | 8.60E-36  | 4.01E-33  |
| <i>Col18a1</i>  | 0.44      | 0.12       | 0.77       | 6.64            | 2.73              | 1.92E-36  | 9.61E-34  |
| <i>AU021092</i> | 0.39      | 0.10       | 0.67       | 6.55            | 2.71              | 1.87E-32  | 7.65E-30  |
| <i>Slco1c1</i>  | 0.40      | 0.11       | 0.70       | 6.49            | 2.70              | 4.12E-33  | 1.73E-30  |
| <i>Itm2a</i>    | 0.99      | 0.27       | 1.72       | 6.30            | 2.65              | 9.91E-77  | 1.41E-73  |
| <i>Slc1a4</i>   | 0.59      | 0.16       | 1.01       | 6.17            | 2.62              | 9.36E-46  | 6.01E-43  |
| <i>Zic3</i>     | 0.52      | 0.15       | 0.89       | 6.15            | 2.62              | 1.19E-40  | 6.66E-38  |
| <i>Tspan18</i>  | 0.50      | 0.14       | 0.85       | 5.85            | 2.55              | 3.01E-37  | 1.55E-34  |
| <i>Lmo2</i>     | 0.60      | 0.18       | 1.02       | 5.79            | 2.53              | 4.09E-44  | 2.44E-41  |
| <i>Tfr3</i>     | 0.67      | 0.20       | 1.15       | 5.77            | 2.53              | 1.45E-49  | 1.05E-46  |
| <i>Ramp2</i>    | 0.68      | 0.20       | 1.17       | 5.74            | 2.52              | 2.80E-50  | 2.07E-47  |
| <i>Rasip1</i>   | 0.41      | 0.12       | 0.70       | 5.72            | 2.52              | 2.68E-30  | 9.69E-28  |
| <i>Lsr</i>      | 0.38      | 0.11       | 0.64       | 5.69            | 2.51              | 9.28E-28  | 3.07E-25  |
| <i>Slc40a1</i>  | 0.50      | 0.15       | 0.85       | 5.59            | 2.48              | 6.17E-36  | 2.96E-33  |
| <i>Myo10</i>    | 0.69      | 0.21       | 1.18       | 5.56            | 2.48              | 1.92E-49  | 1.36E-46  |
| <i>Eogt</i>     | 0.40      | 0.12       | 0.67       | 5.54            | 2.47              | 1.11E-28  | 3.86E-26  |
| <i>Limch1</i>   | 0.45      | 0.14       | 0.76       | 5.49            | 2.46              | 1.07E-31  | 4.08E-29  |
| <i>Sox18</i>    | 0.33      | 0.10       | 0.56       | 5.48            | 2.45              | 6.61E-24  | 1.89E-21  |
| <i>Plxnd1</i>   | 0.43      | 0.14       | 0.73       | 5.36            | 2.42              | 1.31E-30  | 4.84E-28  |
| <i>Mpz11</i>    | 0.55      | 0.17       | 0.93       | 5.33            | 2.41              | 9.54E-38  | 5.07E-35  |
| <i>Slc39a8</i>  | 0.40      | 0.13       | 0.67       | 5.26            | 2.40              | 9.99E-28  | 3.27E-25  |
| <i>Adgrf5</i>   | 0.50      | 0.16       | 0.83       | 5.26            | 2.40              | 8.70E-34  | 3.80E-31  |
| <i>Aplnr</i>    | 0.32      | 0.10       | 0.54       | 5.23            | 2.39              | 2.82E-22  | 7.26E-20  |
| <i>Slc6a6</i>   | 1.05      | 0.35       | 1.76       | 5.08            | 2.34              | 7.13E-68  | 8.37E-65  |
| <i>Slc38a2</i>  | 2.31      | 0.77       | 3.86       | 5.03            | 2.33              | 1.32E-134 | 4.07E-131 |
| <i>Abcb1a</i>   | 0.31      | 0.10       | 0.51       | 4.92            | 2.30              | 4.16E-20  | 9.83E-18  |
| <i>Prnp</i>     | 0.49      | 0.17       | 0.81       | 4.92            | 2.30              | 2.15E-31  | 8.06E-29  |
| <i>Tsc22d1</i>  | 2.10      | 0.71       | 3.48       | 4.87            | 2.29              | 6.04E-123 | 1.58E-119 |
| <i>Slc39a10</i> | 0.61      | 0.21       | 1.01       | 4.72            | 2.24              | 6.00E-38  | 3.24E-35  |
| <i>Apod</i>     | 0.90      | 0.32       | 1.49       | 4.68            | 2.23              | 2.84E-54  | 2.42E-51  |
| <i>Lrp8</i>     | 0.38      | 0.14       | 0.62       | 4.55            | 2.18              | 8.99E-23  | 2.39E-20  |
| <i>Thsd1</i>    | 0.30      | 0.11       | 0.49       | 4.54            | 2.18              | 4.32E-18  | 9.20E-16  |
| <i>Robo4</i>    | 0.28      | 0.10       | 0.46       | 4.53            | 2.18              | 1.35E-17  | 2.72E-15  |
| <i>Ccnjl</i>    | 0.38      | 0.14       | 0.63       | 4.51            | 2.17              | 3.75E-23  | 1.03E-20  |
| <i>Enpp2</i>    | 0.29      | 0.10       | 0.47       | 4.50            | 2.17              | 2.17E-17  | 4.30E-15  |
| <i>Apln</i>     | 0.29      | 0.10       | 0.47       | 4.48            | 2.16              | 2.17E-17  | 4.30E-15  |
| <i>Plvap</i>    | 0.30      | 0.11       | 0.50       | 4.47            | 2.16              | 8.61E-19  | 1.91E-16  |
| <i>Bsg</i>      | 0.97      | 0.36       | 1.58       | 4.43            | 2.15              | 1.36E-54  | 1.18E-51  |
| <i>Sox17</i>    | 0.28      | 0.10       | 0.45       | 4.42            | 2.14              | 5.71E-17  | 1.09E-14  |
| <i>Nampt</i>    | 0.49      | 0.18       | 0.81       | 4.40            | 2.14              | 1.89E-28  | 6.49E-26  |
| <i>Palmd</i>    | 0.31      | 0.11       | 0.50       | 4.39            | 2.13              | 2.57E-18  | 5.56E-16  |
| <i>Eng</i>      | 0.49      | 0.18       | 0.80       | 4.37            | 2.13              | 3.94E-28  | 1.31E-25  |
| <i>Kank3</i>    | 0.30      | 0.11       | 0.49       | 4.36            | 2.12              | 4.87E-18  | 1.03E-15  |
| <i>Tek</i>      | 0.40      | 0.15       | 0.65       | 4.34            | 2.12              | 1.16E-22  | 3.05E-20  |
| <i>Pde8a</i>    | 0.33      | 0.12       | 0.53       | 4.33            | 2.12              | 8.93E-19  | 1.97E-16  |
| <i>Ctla2a</i>   | 0.30      | 0.11       | 0.48       | 4.32            | 2.11              | 3.97E-17  | 7.59E-15  |
| <i>Milt4</i>    | 0.57      | 0.22       | 0.93       | 4.27            | 2.10              | 1.39E-31  | 5.24E-29  |
| <i>Podxl</i>    | 0.31      | 0.12       | 0.50       | 4.27            | 2.10              | 7.15E-18  | 1.48E-15  |
| <i>Dock9</i>    | 0.31      | 0.12       | 0.50       | 4.26            | 2.09              | 7.15E-18  | 1.48E-15  |
| <i>Ablim1</i>   | 0.58      | 0.22       | 0.94       | 4.24            | 2.08              | 2.88E-32  | 1.17E-29  |
| <i>Gja1</i>     | 0.28      | 0.11       | 0.45       | 4.19            | 2.07              | 4.57E-16  | 8.14E-14  |
| <i>Ece1</i>     | 0.31      | 0.12       | 0.49       | 4.13            | 2.05              | 7.03E-17  | 1.32E-14  |



|                     |      |      |      |      |      |          |          |
|---------------------|------|------|------|------|------|----------|----------|
| <i>Myh10</i>        | 0.85 | 0.33 | 1.37 | 4.12 | 2.04 | 1.04E-44 | 6.43E-42 |
| <i>Erg</i>          | 0.26 | 0.10 | 0.41 | 4.10 | 2.03 | 2.53E-14 | 4.01E-12 |
| <i>Esam</i>         | 0.69 | 0.27 | 1.11 | 4.06 | 2.02 | 5.78E-36 | 2.81E-33 |
| <i>Gm28045 Prnd</i> | 0.25 | 0.10 | 0.40 | 4.02 | 2.01 | 1.47E-13 | 2.18E-11 |
| <i>Mecom</i>        | 0.27 | 0.11 | 0.43 | 4.01 | 2.00 | 1.35E-14 | 2.19E-12 |
| <i>Cyrr1</i>        | 0.27 | 0.11 | 0.43 | 4.00 | 2.00 | 2.07E-14 | 3.32E-12 |
| <i>Sh3bp5</i>       | 0.42 | 0.17 | 0.68 | 4.00 | 2.00 | 6.14E-22 | 1.57E-19 |
| <i>Adm</i>          | 0.31 | 0.12 | 0.49 | 3.99 | 2.00 | 2.09E-16 | 3.83E-14 |
| <i>Kcp</i>          | 0.34 | 0.14 | 0.54 | 3.98 | 1.99 | 3.82E-18 | 8.23E-16 |
| <i>Cdc42ep3</i>     | 0.31 | 0.13 | 0.49 | 3.94 | 1.98 | 4.64E-16 | 8.22E-14 |
| <i>Sema6a</i>       | 0.65 | 0.26 | 1.04 | 3.93 | 1.98 | 2.95E-32 | 1.18E-29 |
| <i>Fli1</i>         | 0.40 | 0.16 | 0.64 | 3.89 | 1.96 | 1.58E-20 | 3.81E-18 |
| <i>Ccdc141</i>      | 0.39 | 0.16 | 0.62 | 3.87 | 1.95 | 7.16E-20 | 1.67E-17 |
| <i>Ptprg</i>        | 0.48 | 0.20 | 0.77 | 3.87 | 1.95 | 2.69E-24 | 7.91E-22 |
| <i>Plk2</i>         | 0.34 | 0.14 | 0.54 | 3.82 | 1.93 | 2.88E-17 | 5.57E-15 |
| <i>Escr</i>         | 0.38 | 0.16 | 0.60 | 3.82 | 1.93 | 2.14E-19 | 4.93E-17 |
| <i>Dok4</i>         | 0.27 | 0.11 | 0.43 | 3.80 | 1.93 | 4.26E-14 | 6.65E-12 |
| <i>Csrp2</i>        | 0.47 | 0.20 | 0.74 | 3.76 | 1.91 | 1.11E-22 | 2.92E-20 |
| <i>Lef1</i>         | 0.29 | 0.12 | 0.46 | 3.76 | 1.91 | 1.61E-14 | 2.58E-12 |
| <i>Fn1</i>          | 1.23 | 0.52 | 1.95 | 3.75 | 1.91 | 4.92E-57 | 4.78E-54 |
| <i>Efna1</i>        | 0.25 | 0.11 | 0.40 | 3.72 | 1.90 | 1.61E-12 | 2.19E-10 |
| <i>Slc3a2</i>       | 1.80 | 0.77 | 2.83 | 3.69 | 1.88 | 1.96E-80 | 3.18E-77 |
| <i>Sox7</i>         | 0.24 | 0.10 | 0.38 | 3.68 | 1.88 | 8.83E-12 | 1.15E-09 |
| <i>Adamts12</i>     | 0.23 | 0.10 | 0.37 | 3.67 | 1.88 | 1.12E-11 | 1.43E-09 |
| <i>Abca1</i>        | 0.93 | 0.40 | 1.46 | 3.67 | 1.88 | 3.11E-42 | 1.76E-39 |
| <i>Tdrp</i>         | 0.24 | 0.10 | 0.37 | 3.62 | 1.86 | 6.17E-12 | 8.11E-10 |
| <i>Apcdd1</i>       | 0.28 | 0.12 | 0.44 | 3.60 | 1.85 | 1.87E-13 | 2.67E-11 |

**Table S6**

Related to Figure 2

List of genes most strongly enriched in the microglia cluster of the scRNA-seq dataset.

| Gene             | Base Mean | Base MeanA | Base MeanB | fold-enrichment | log2 [enrichment] | p value   | FDR       |
|------------------|-----------|------------|------------|-----------------|-------------------|-----------|-----------|
| <i>C1qb</i>      | 3.56      | 0.20       | 6.93       | 34.99           | 5.13              | 0.00E+00  | 0.00E+00  |
| <i>Ctss</i>      | 2.87      | 0.17       | 5.57       | 33.32           | 5.06              | 0.00E+00  | 0.00E+00  |
| <i>C1qc</i>      | 2.13      | 0.14       | 4.13       | 29.80           | 4.90              | 0.00E+00  | 0.00E+00  |
| <i>Csf1r</i>     | 2.28      | 0.15       | 4.40       | 28.70           | 4.84              | 0.00E+00  | 0.00E+00  |
| <i>Ly86</i>      | 1.76      | 0.12       | 3.39       | 27.79           | 4.80              | 7.45E-222 | 2.54E-218 |
| <i>Hexb</i>      | 2.26      | 0.18       | 4.34       | 24.59           | 4.62              | 0.00E+00  | 0.00E+00  |
| <i>Ccl4</i>      | 1.33      | 0.12       | 2.53       | 21.13           | 4.40              | 1.72E-155 | 3.08E-152 |
| <i>Cx3cr1</i>    | 1.38      | 0.12       | 2.64       | 21.12           | 4.40              | 4.75E-161 | 1.01E-157 |
| <i>P2ry12</i>    | 1.25      | 0.11       | 2.38       | 20.79           | 4.38              | 8.41E-145 | 1.30E-141 |
| <i>Fcer1g</i>    | 1.38      | 0.13       | 2.62       | 20.05           | 4.33              | 9.43E-158 | 1.78E-154 |
| <i>Fcrls</i>     | 1.24      | 0.12       | 2.35       | 19.62           | 4.29              | 1.46E-141 | 2.16E-138 |
| <i>ApoE</i>      | 7.48      | 0.76       | 14.21      | 18.62           | 4.22              | 0.00E+00  | 0.00E+00  |
| <i>Mpeg1</i>     | 1.15      | 0.12       | 2.18       | 18.48           | 4.21              | 5.02E-129 | 6.84E-126 |
| <i>C3ar1</i>     | 1.18      | 0.12       | 2.24       | 18.02           | 4.17              | 7.47E-131 | 1.06E-127 |
| <i>Ctsd</i>      | 2.35      | 0.25       | 4.45       | 17.67           | 4.14              | 0.00E+00  | 0.00E+00  |
| <i>Ctsb</i>      | 4.30      | 0.47       | 8.13       | 17.24           | 4.11              | 0.00E+00  | 0.00E+00  |
| <i>Lgmn</i>      | 1.52      | 0.17       | 2.88       | 17.05           | 4.09              | 5.47E-165 | 1.24E-161 |
| <i>C1qa</i>      | 0.99      | 0.11       | 1.87       | 16.55           | 4.05              | 1.13E-106 | 1.33E-103 |
| <i>Tyrobp</i>    | 0.87      | 0.11       | 1.64       | 15.01           | 3.91              | 1.02E-90  | 1.06E-87  |
| <i>Cd53</i>      | 0.96      | 0.14       | 1.78       | 12.92           | 3.69              | 6.42E-94  | 6.83E-91  |
| <i>Laptm5</i>    | 1.96      | 0.30       | 3.63       | 11.96           | 3.58              | 3.23E-179 | 7.84E-176 |
| <i>Kctd12</i>    | 0.95      | 0.16       | 1.73       | 11.17           | 3.48              | 6.03E-86  | 5.86E-83  |
| <i>Atf3</i>      | 1.46      | 0.26       | 2.66       | 10.32           | 3.37              | 4.75E-126 | 6.22E-123 |
| <i>Lyz1 Lyz2</i> | 0.64      | 0.11       | 1.16       | 10.24           | 3.36              | 3.82E-56  | 2.50E-53  |
| <i>Fcgr3</i>     | 0.62      | 0.11       | 1.13       | 10.07           | 3.33              | 2.52E-54  | 1.56E-51  |
| <i>Hpgds</i>     | 0.67      | 0.12       | 1.22       | 10.06           | 3.33              | 9.10E-58  | 6.20E-55  |
| <i>Gm</i>        | 1.92      | 0.35       | 3.48       | 9.99            | 3.32              | 1.08E-159 | 2.16E-156 |
| <i>Plek</i>      | 0.61      | 0.11       | 1.10       | 9.71            | 3.28              | 1.21E-51  | 7.00E-49  |
| <i>Ccl3</i>      | 0.71      | 0.14       | 1.29       | 9.40            | 3.23              | 2.24E-59  | 1.66E-56  |
| <i>Cd83</i>      | 0.66      | 0.13       | 1.20       | 9.37            | 3.23              | 6.01E-55  | 3.86E-52  |
| <i>Coro1a</i>    | 0.58      | 0.11       | 1.06       | 9.25            | 3.21              | 6.79E-48  | 3.67E-45  |
| <i>Ctsl</i>      | 1.49      | 0.30       | 2.68       | 8.97            | 3.16              | 3.02E-118 | 3.80E-115 |
| <i>Aif1</i>      | 0.54      | 0.11       | 0.97       | 8.91            | 3.15              | 1.28E-43  | 6.04E-41  |
| <i>Siglech</i>   | 0.51      | 0.10       | 0.91       | 8.76            | 3.13              | 5.42E-41  | 2.22E-38  |
| <i>Cst3</i>      | 2.89      | 0.60       | 5.17       | 8.58            | 3.10              | 7.51E-194 | 2.32E-190 |
| <i>Ptgs1</i>     | 0.53      | 0.11       | 0.95       | 8.49            | 3.09              | 3.89E-42  | 1.70E-39  |
| <i>Sirpa</i>     | 0.65      | 0.14       | 1.16       | 8.47            | 3.08              | 3.74E-51  | 2.12E-48  |
| <i>Lpl</i>       | 0.64      | 0.14       | 1.14       | 7.90            | 2.98              | 1.65E-47  | 8.77E-45  |
| <i>Cd52</i>      | 0.45      | 0.10       | 0.79       | 7.65            | 2.94              | 1.77E-33  | 5.90E-31  |
| <i>Bin2</i>      | 0.52      | 0.12       | 0.91       | 7.55            | 2.92              | 1.28E-37  | 4.85E-35  |
| <i>Spp1</i>      | 0.43      | 0.10       | 0.75       | 7.37            | 2.88              | 3.26E-31  | 1.00E-28  |
| <i>Ilgam</i>     | 0.46      | 0.11       | 0.80       | 7.27            | 2.86              | 6.08E-33  | 2.01E-30  |
| <i>Olfml3</i>    | 0.59      | 0.14       | 1.03       | 7.26            | 2.86              | 6.20E-42  | 2.67E-39  |
| <i>Trem2</i>     | 0.43      | 0.10       | 0.75       | 7.23            | 2.85              | 7.25E-31  | 2.18E-28  |
| <i>Ly6e</i>      | 0.76      | 0.19       | 1.34       | 7.23            | 2.85              | 5.09E-54  | 3.04E-51  |
| <i>Ncf1</i>      | 0.43      | 0.11       | 0.76       | 7.02            | 2.81              | 2.29E-30  | 6.79E-28  |
| <i>P2ry13</i>    | 0.43      | 0.11       | 0.76       | 6.90            | 2.79              | 2.29E-30  | 6.79E-28  |
| <i>Cfh</i>       | 0.50      | 0.13       | 0.87       | 6.88            | 2.78              | 2.37E-34  | 8.16E-32  |
| <i>B2m</i>       | 2.47      | 0.63       | 4.31       | 6.82            | 2.77              | 4.58E-148 | 7.80E-145 |
| <i>Plid4</i>     | 0.41      | 0.11       | 0.72       | 6.77            | 2.76              | 1.78E-28  | 5.08E-26  |
| <i>Adgre1</i>    | 0.40      | 0.10       | 0.70       | 6.76            | 2.76              | 8.69E-28  | 2.37E-25  |
| <i>Evi2a</i>     | 0.42      | 0.11       | 0.72       | 6.67            | 2.74              | 7.84E-28  | 2.15E-25  |
| <i>Unc93b1</i>   | 0.49      | 0.13       | 0.85       | 6.64            | 2.73              | 1.09E-32  | 3.47E-30  |
| <i>Il1a</i>      | 0.40      | 0.11       | 0.70       | 6.56            | 2.71              | 3.81E-27  | 1.01E-24  |
| <i>Fyb</i>       | 0.40      | 0.11       | 0.70       | 6.55            | 2.71              | 1.21E-26  | 3.16E-24  |
| <i>Psap</i>      | 1.14      | 0.31       | 1.97       | 6.45            | 2.69              | 1.40E-72  | 1.17E-69  |
| <i>Apbb1ip</i>   | 0.38      | 0.10       | 0.65       | 6.42            | 2.68              | 4.36E-25  | 1.02E-22  |
| <i>Cd180</i>     | 0.36      | 0.10       | 0.63       | 6.17            | 2.63              | 1.34E-23  | 2.92E-21  |
| <i>Cd33</i>      | 0.40      | 0.11       | 0.70       | 6.06            | 2.60              | 1.98E-25  | 4.78E-23  |
| <i>Il6ra</i>     | 0.40      | 0.12       | 0.69       | 5.99            | 2.58              | 1.98E-25  | 4.78E-23  |
| <i>Cyth4</i>     | 0.39      | 0.11       | 0.67       | 5.99            | 2.58              | 1.47E-24  | 3.37E-22  |
| <i>Ctsz</i>      | 0.85      | 0.25       | 1.45       | 5.93            | 2.57              | 9.97E-51  | 5.48E-48  |
| <i>Tgfb1</i>     | 0.73      | 0.21       | 1.25       | 5.88            | 2.56              | 4.12E-43  | 1.92E-40  |
| <i>Pde3b</i>     | 0.43      | 0.12       | 0.73       | 5.87            | 2.55              | 6.47E-26  | 1.61E-23  |
| <i>Nckap1l</i>   | 0.36      | 0.11       | 0.61       | 5.79            | 2.53              | 4.86E-22  | 9.62E-20  |
| <i>Gpr34</i>     | 0.35      | 0.10       | 0.60       | 5.78            | 2.53              | 7.63E-22  | 1.50E-19  |
| <i>Rnase4</i>    | 0.80      | 0.24       | 1.36       | 5.77            | 2.53              | 2.12E-46  | 1.08E-43  |
| <i>Rac2</i>      | 0.37      | 0.11       | 0.63       | 5.72            | 2.52              | 3.76E-22  | 7.49E-20  |
| <i>Arhgap25</i>  | 0.44      | 0.13       | 0.74       | 5.61            | 2.49              | 9.54E-26  | 2.34E-23  |
| <i>Serinc3</i>   | 2.18      | 0.67       | 3.69       | 5.51            | 2.46              | 4.48E-113 | 5.45E-110 |
| <i>Ctsc</i>      | 0.57      | 0.18       | 0.96       | 5.34            | 2.42              | 1.86E-31  | 5.75E-29  |
| <i>Man2b1</i>    | 0.48      | 0.15       | 0.80       | 5.34            | 2.42              | 1.33E-26  | 3.47E-24  |
| <i>Pou2f2</i>    | 0.46      | 0.15       | 0.78       | 5.33            | 2.41              | 5.32E-26  | 1.33E-23  |

|               |      |      |      |      |      |          |          |
|---------------|------|------|------|------|------|----------|----------|
| <i>Myo1f</i>  | 0.33 | 0.11 | 0.56 | 5.29 | 2.40 | 9.81E-19 | 1.63E-16 |
| <i>Tpd52</i>  | 0.43 | 0.14 | 0.73 | 5.23 | 2.39 | 5.22E-24 | 1.16E-21 |
| <i>Ptpn6</i>  | 0.40 | 0.13 | 0.68 | 5.21 | 2.38 | 1.53E-22 | 3.18E-20 |
| <i>Lpcat2</i> | 0.32 | 0.10 | 0.54 | 5.20 | 2.38 | 2.84E-18 | 4.65E-16 |
| <i>Ptprc</i>  | 0.34 | 0.11 | 0.57 | 5.19 | 2.38 | 3.87E-19 | 6.55E-17 |
| <i>Maf</i>    | 0.68 | 0.22 | 1.14 | 5.17 | 2.37 | 7.56E-37 | 2.77E-34 |
| <i>Selplg</i> | 0.33 | 0.11 | 0.55 | 5.17 | 2.37 | 2.84E-18 | 4.65E-16 |
| <i>Gusb</i>   | 0.66 | 0.22 | 1.10 | 5.07 | 2.34 | 2.30E-34 | 7.98E-32 |
| <i>Ncf2</i>   | 0.38 | 0.13 | 0.64 | 5.02 | 2.33 | 1.65E-20 | 3.04E-18 |
| <i>Rgs10</i>  | 0.39 | 0.13 | 0.65 | 5.00 | 2.32 | 3.64E-21 | 6.85E-19 |
| <i>Mt1</i>    | 0.43 | 0.14 | 0.72 | 4.97 | 2.31 | 2.42E-22 | 4.87E-20 |
| <i>Cd9</i>    | 0.49 | 0.16 | 0.81 | 4.96 | 2.31 | 2.80E-25 | 6.63E-23 |
| <i>Abhd12</i> | 0.46 | 0.16 | 0.77 | 4.86 | 2.28 | 9.00E-24 | 1.98E-21 |
| <i>Lgals9</i> | 0.46 | 0.16 | 0.77 | 4.84 | 2.28 | 9.00E-24 | 1.98E-21 |
| <i>Trib1</i>  | 0.59 | 0.20 | 0.97 | 4.82 | 2.27 | 3.73E-29 | 1.07E-26 |
| <i>Cd84</i>   | 0.32 | 0.11 | 0.53 | 4.76 | 2.25 | 3.47E-16 | 5.14E-14 |
| <i>Arpc1b</i> | 1.23 | 0.43 | 2.03 | 4.74 | 2.25 | 5.23E-59 | 3.71E-56 |
| <i>Neat1</i>  | 0.42 | 0.15 | 0.70 | 4.73 | 2.24 | 2.04E-21 | 3.87E-19 |
| <i>Plin2</i>  | 0.51 | 0.18 | 0.83 | 4.62 | 2.21 | 1.05E-24 | 2.42E-22 |
| <i>Ifrd1</i>  | 0.69 | 0.25 | 1.14 | 4.62 | 2.21 | 8.82E-33 | 2.89E-30 |
| <i>Vsir</i>   | 0.36 | 0.13 | 0.59 | 4.59 | 2.20 | 7.76E-18 | 1.25E-15 |
| <i>Runx1</i>  | 0.32 | 0.11 | 0.52 | 4.57 | 2.19 | 1.00E-15 | 1.44E-13 |
| <i>Parvg</i>  | 0.30 | 0.11 | 0.49 | 4.55 | 2.19 | 6.75E-15 | 9.26E-13 |
| <i>Ifi30</i>  | 0.36 | 0.13 | 0.59 | 4.55 | 2.18 | 1.31E-17 | 2.09E-15 |
| <i>Hexa</i>   | 0.46 | 0.17 | 0.75 | 4.52 | 2.18 | 1.57E-21 | 3.02E-19 |
| <i>Sgpl1</i>  | 0.44 | 0.16 | 0.71 | 4.51 | 2.17 | 1.05E-20 | 1.94E-18 |
| <i>Arl4c</i>  | 0.40 | 0.15 | 0.66 | 4.49 | 2.17 | 4.89E-19 | 8.21E-17 |

**Table S7**

Related to Figure 3

Top 50 enriched genes in the EMBRACE-isolated neural population (CD45<sup>neg</sup>, CD41<sup>neg</sup>, CD11b<sup>neg</sup>, PECAM1<sup>neg</sup>, CD102<sup>neg</sup>, PDGFRβ<sup>neg</sup>).

| Gene            | baseMean | log2FC | p value  | FDR      |
|-----------------|----------|--------|----------|----------|
| <i>Gm42418</i>  | 4045.63  | 15.89  | 3.35E-88 | 6.93E-85 |
| <i>Ptpm2</i>    | 294.82   | 11.60  | 6.49E-55 | 3.42E-52 |
| <i>Slc32a1</i>  | 220.18   | 11.50  | 3.14E-55 | 1.72E-52 |
| <i>Gm8203</i>   | 177.07   | 11.48  | 1.41E-49 | 5.10E-47 |
| <i>Xkr7</i>     | 169.99   | 11.43  | 2.44E-50 | 9.79E-48 |
| <i>Ecel1</i>    | 166.55   | 11.40  | 3.71E-49 | 1.31E-46 |
| <i>Pdcd2</i>    | 132.45   | 11.08  | 1.11E-46 | 3.44E-44 |
| <i>Myo16</i>    | 194.24   | 11.02  | 5.57E-53 | 2.63E-50 |
| <i>Nalcn</i>    | 119.54   | 10.93  | 1.08E-45 | 3.19E-43 |
| <i>Shisa6</i>   | 106.85   | 10.77  | 1.68E-43 | 4.30E-41 |
| <i>Gpr26</i>    | 129.34   | 10.74  | 4.48E-47 | 1.43E-44 |
| <i>Uncx</i>     | 157.31   | 10.69  | 1.16E-43 | 3.02E-41 |
| <i>Gjd2</i>     | 90.05    | 10.52  | 4.59E-41 | 9.78E-39 |
| <i>Tmem28</i>   | 106.58   | 10.46  | 7.67E-43 | 1.89E-40 |
| <i>Fam189a1</i> | 105.19   | 10.45  | 1.83E-44 | 4.97E-42 |
| <i>Rtn4r</i>    | 85.74    | 10.44  | 6.58E-38 | 1.14E-35 |
| <i>Reln</i>     | 1791.73  | 10.40  | 6.61E-18 | 2.21E-16 |
| <i>Grm4</i>     | 79.77    | 10.35  | 1.27E-39 | 2.42E-37 |
| <i>Islr2</i>    | 4212.44  | 10.33  | 2.29E-31 | 2.54E-29 |
| <i>Lrrn2</i>    | 270.23   | 10.25  | 3.59E-65 | 3.32E-62 |
| <i>Tmem59l</i>  | 111.39   | 10.23  | 3.44E-45 | 9.72E-43 |
| <i>Kndc1</i>    | 90.12    | 10.23  | 1.93E-42 | 4.52E-40 |
| <i>Erbp4</i>    | 334.30   | 10.20  | 2.55E-63 | 2.21E-60 |
| <i>Gm12481</i>  | 69.70    | 10.14  | 3.11E-35 | 4.52E-33 |
| <i>Miat</i>     | 13098.89 | 10.09  | 2.87E-46 | 8.66E-44 |
| <i>Gm5812</i>   | 64.73    | 10.05  | 8.99E-37 | 1.50E-34 |
| <i>Hrh3</i>     | 76.46    | 10.00  | 4.83E-39 | 8.89E-37 |
| <i>Gabra3</i>   | 141.92   | 10.00  | 5.50E-47 | 1.74E-44 |
| <i>Mmp24</i>    | 430.49   | 9.99   | 1.46E-11 | 2.30E-10 |
| <i>Galnt14</i>  | 61.39    | 9.98   | 5.85E-36 | 9.08E-34 |
| <i>Zim1</i>     | 94.94    | 9.96   | 2.45E-35 | 3.60E-33 |
| <i>Sorcs3</i>   | 75.21    | 9.95   | 3.73E-36 | 5.96E-34 |
| <i>Magel2</i>   | 868.39   | 9.94   | 2.44E-27 | 2.01E-25 |
| <i>Frmppd3</i>  | 91.12    | 9.92   | 1.82E-37 | 3.10E-35 |
| <i>Epha8</i>    | 87.93    | 9.90   | 2.04E-41 | 4.42E-39 |
| <i>Chrna3</i>   | 56.23    | 9.84   | 1.61E-33 | 2.18E-31 |
| <i>Kcnf1</i>    | 66.83    | 9.80   | 1.81E-38 | 3.25E-36 |
| <i>Disp2</i>    | 604.76   | 9.78   | 9.20E-14 | 1.93E-12 |
| <i>Thsd7b</i>   | 65.77    | 9.76   | 4.70E-36 | 7.38E-34 |
| <i>Gm996</i>    | 63.80    | 9.74   | 2.76E-38 | 4.85E-36 |
| <i>Gm27032</i>  | 51.06    | 9.71   | 8.27E-34 | 1.13E-31 |
| <i>Scg2</i>     | 118.04   | 9.69   | 5.71E-18 | 1.92E-16 |
| <i>Tunar</i>    | 47.92    | 9.62   | 3.46E-32 | 4.22E-30 |
| <i>Tenm1</i>    | 73.28    | 9.57   | 1.08E-30 | 1.12E-28 |
| <i>Zfhx2os</i>  | 56.80    | 9.57   | 2.86E-36 | 4.63E-34 |
| <i>Lgi2</i>     | 46.12    | 9.57   | 3.54E-32 | 4.31E-30 |
| <i>Rgs7</i>     | 46.23    | 9.56   | 2.44E-30 | 2.46E-28 |
| <i>Adcyap1</i>  | 44.62    | 9.51   | 2.42E-31 | 2.68E-29 |
| <i>Syde2</i>    | 54.11    | 9.50   | 7.23E-36 | 1.12E-33 |
| <i>Cnpy1</i>    | 357.67   | 9.38   | 2.14E-16 | 6.08E-15 |

**Table S8**

Related to Figure 3

Top 50 enriched genes in the EMBRACE-isolated mural cell population (PDGFR $\beta$ <sup>high</sup>, PECAM1<sup>neg</sup>, CD102<sup>neg</sup>, CD45<sup>neg</sup>, CD41<sup>neg</sup>, CD11b<sup>neg</sup>). Due to their high abundance in the list, genes with the Gm prefix were removed from this list.

| Gene                 | baseMean | log2FC | p value  | FDR      |
|----------------------|----------|--------|----------|----------|
| <i>Kcne4</i>         | 933.90   | 12.51  | 1.60E-38 | 4.74E-35 |
| <i>Cpa1</i>          | 309.65   | 11.90  | 9.97E-44 | 4.72E-40 |
| <i>Ednra</i>         | 5589.26  | 11.86  | 2.58E-43 | 1.02E-39 |
| <i>Atp13a5</i>       | 616.11   | 10.83  | 3.05E-18 | 1.90E-15 |
| <i>Enpep</i>         | 222.42   | 10.58  | 1.57E-47 | 9.30E-44 |
| <i>Mmp9</i>          | 11155.83 | 10.36  | 6.24E-20 | 5.09E-17 |
| <i>Alx1</i>          | 156.94   | 10.25  | 2.15E-29 | 3.91E-26 |
| <i>Hcar1</i>         | 87.23    | 10.23  | 1.15E-21 | 1.23E-18 |
| <i>Slc6a20a</i>      | 254.82   | 10.03  | 2.22E-18 | 1.46E-15 |
| <i>4933431K23Rik</i> | 69.23    | 9.75   | 3.23E-26 | 4.78E-23 |
| <i>Rarres2</i>       | 185.96   | 9.74   | 2.22E-35 | 5.83E-32 |
| <i>Vtn</i>           | 12818.27 | 9.42   | 3.07E-15 | 1.17E-12 |
| <i>B830012L14Rik</i> | 214.23   | 9.27   | 1.53E-59 | 1.81E-55 |
| <i>Sod3</i>          | 359.20   | 9.26   | 4.10E-31 | 8.82E-28 |
| <i>8030451A03Rik</i> | 84.20    | 9.05   | 3.30E-16 | 1.62E-13 |
| <i>Tbx18</i>         | 406.60   | 8.69   | 2.12E-15 | 8.51E-13 |
| <i>Akr1c12</i>       | 33.37    | 8.68   | 1.15E-11 | 2.12E-09 |
| <i>Vpreb3</i>        | 30.63    | 8.61   | 4.61E-20 | 3.90E-17 |
| <i>Cd248</i>         | 1895.31  | 8.12   | 2.09E-17 | 1.12E-14 |
| <i>Art3</i>          | 1845.52  | 8.07   | 6.34E-24 | 7.89E-21 |
| <i>Ins2</i>          | 22.41    | 8.03   | 5.27E-09 | 4.95E-07 |
| <i>Slc38a11</i>      | 137.30   | 7.98   | 2.29E-19 | 1.75E-16 |
| <i>Postn</i>         | 605.46   | 7.86   | 1.90E-15 | 7.76E-13 |
| <i>C1qtnf2</i>       | 86.03    | 7.84   | 9.73E-16 | 4.19E-13 |
| <i>Myocd</i>         | 30.12    | 7.81   | 6.25E-15 | 2.24E-12 |
| <i>1600015I10Rik</i> | 15.33    | 7.71   | 2.61E-10 | 3.52E-08 |
| <i>4921534H16Rik</i> | 16.11    | 7.61   | 2.30E-08 | 1.84E-06 |
| <i>Mylk4</i>         | 86.57    | 7.57   | 2.05E-22 | 2.31E-19 |
| <i>Vstm4</i>         | 663.01   | 7.55   | 4.08E-07 | 2.27E-05 |
| <i>Ndufa4l2</i>      | 6822.54  | 7.55   | 2.89E-10 | 3.83E-08 |
| <i>Cspg4</i>         | 2288.33  | 7.50   | 5.72E-12 | 1.14E-09 |
| <i>Krtdap</i>        | 16.93    | 7.44   | 1.73E-06 | 7.67E-05 |
| <i>Kcnmb1</i>        | 228.04   | 7.43   | 2.18E-08 | 1.75E-06 |
| <i>MyI9</i>          | 8993.35  | 7.31   | 2.34E-24 | 3.08E-21 |
| <i>S1pr3</i>         | 3632.06  | 7.28   | 5.15E-06 | 1.91E-04 |
| <i>S1pr3</i>         | 3632.06  | 7.28   | 5.15E-06 | 0.000191 |
| <i>Npn2</i>          | 12.38    | 7.25   | 1.29E-07 | 8.36E-06 |
| <i>2010003K11Rik</i> | 14.42    | 7.25   | 0.000873 | 0.010468 |
| <i>Col6a3</i>        | 192.08   | 7.23   | 4.75E-07 | 2.56E-05 |
| <i>Rgs4</i>          | 13901.09 | 7.21   | 9.88E-09 | 8.63E-07 |
| <i>Prss45</i>        | 11.53    | 7.20   | 6.59E-08 | 4.64E-06 |
| <i>Bmp5</i>          | 317.08   | 7.20   | 5.23E-07 | 2.78E-05 |
| <i>Lamc3</i>         | 717.82   | 7.15   | 1.01E-07 | 6.79E-06 |
| <i>C1qtnf7</i>       | 13.84    | 7.14   | 5.78E-09 | 5.34E-07 |
| <i>Gpr20</i>         | 56.94    | 7.14   | 2.08E-08 | 1.69E-06 |
| <i>Tmc5</i>          | 112.89   | 7.14   | 2.50E-07 | 1.50E-05 |
| <i>Des</i>           | 125.96   | 7.12   | 2.75E-08 | 2.16E-06 |
| <i>Tnxb</i>          | 106.90   | 7.11   | 6.84E-08 | 4.79E-06 |
| <i>Crygc</i>         | 10.94    | 7.06   | 4.19E-07 | 2.32E-05 |
| <i>Higd1b</i>        | 2370.20  | 7.00   | 8.42E-04 | 1.02E-02 |

**Table S9**

Related to Figure 3

Top 50 enriched genes in the EMBRACE-isolated endothelial cell population (PECAM1<sup>pos</sup>, CD102<sup>pos</sup>, CD45<sup>neg</sup>, CD41<sup>neg</sup>, CD11b<sup>neg</sup>, PDGFRβ<sup>neg</sup>).

| Gene                 | baseMean | log2FC | p value  | FDR      |
|----------------------|----------|--------|----------|----------|
| <i>Myct1</i>         | 675.89   | 12.81  | 1.24E-57 | 1.43E-53 |
| <i>Mogat2</i>        | 510.34   | 12.66  | 4.39E-44 | 2.53E-40 |
| <i>Gimap4</i>        | 332.25   | 12.38  | 8.88E-31 | 1.86E-27 |
| <i>Kcne3</i>         | 362.22   | 12.19  | 3.43E-21 | 3.44E-18 |
| <i>Tbx1</i>          | 339.36   | 11.70  | 4.42E-30 | 8.48E-27 |
| <i>Gm38197</i>       | 377.99   | 11.45  | 1.09E-31 | 3.15E-28 |
| <i>Mall</i>          | 212.27   | 11.43  | 4.55E-26 | 6.97E-23 |
| <i>Igsf5</i>         | 101.69   | 10.67  | 2.16E-20 | 1.85E-17 |
| <i>Cfi</i>           | 107.66   | 10.44  | 1.54E-33 | 5.05E-30 |
| <i>Nos3</i>          | 1955.22  | 10.35  | 7.87E-34 | 3.02E-30 |
| <i>4930578C19Rik</i> | 85.41    | 9.91   | 8.92E-11 | 1.35E-08 |
| <i>A530016L24Rik</i> | 62.83    | 9.75   | 1.01E-12 | 2.38E-10 |
| <i>Gm37393</i>       | 60.31    | 9.73   | 3.53E-13 | 9.23E-11 |
| <i>Gm694</i>         | 47.25    | 9.73   | 7.35E-20 | 5.83E-17 |
| <i>Cldn5</i>         | 14488.32 | 9.54   | 3.02E-09 | 3.26E-07 |
| <i>Rassf9</i>        | 951.34   | 9.30   | 4.94E-13 | 1.23E-10 |
| <i>Gm12866</i>       | 37.97    | 9.29   | 8.43E-15 | 2.85E-12 |
| <i>Rp1</i>           | 108.20   | 9.28   | 1.92E-24 | 2.60E-21 |
| <i>Foxl2</i>         | 237.78   | 9.27   | 1.61E-24 | 2.32E-21 |
| <i>Ces2b</i>         | 53.19    | 9.22   | 4.80E-09 | 4.80E-07 |
| <i>BB365896</i>      | 39.02    | 9.12   | 4.63E-17 | 2.42E-14 |
| <i>Clca2</i>         | 51.76    | 9.02   | 1.13E-10 | 1.67E-08 |
| <i>Slc38a5</i>       | 6137.35  | 9.00   | 4.45E-12 | 9.40E-10 |
| <i>Serpib9b</i>      | 78.97    | 8.98   | 2.89E-14 | 8.98E-12 |
| <i>9930038B18Rik</i> | 30.18    | 8.92   | 9.08E-13 | 2.18E-10 |
| <i>Mmm1</i>          | 1127.35  | 8.85   | 6.41E-15 | 2.23E-12 |
| <i>Gm38066</i>       | 35.10    | 8.85   | 1.36E-09 | 1.62E-07 |
| <i>Psg17</i>         | 39.10    | 8.83   | 1.70E-15 | 6.54E-13 |
| <i>Aplnr</i>         | 4161.45  | 8.75   | 6.14E-08 | 4.53E-06 |
| <i>Gpihbp1</i>       | 25.07    | 8.72   | 3.72E-13 | 9.51E-11 |
| <i>Unc45b</i>        | 275.01   | 8.69   | 5.60E-11 | 8.99E-09 |
| <i>Vwa1</i>          | 4369.62  | 8.68   | 3.22E-16 | 1.51E-13 |
| <i>Adgrl4</i>        | 3021.45  | 8.58   | 3.63E-12 | 7.80E-10 |
| <i>Gpr143</i>        | 32.49    | 8.44   | 8.44E-05 | 2.00E-03 |
| <i>Rhbdl2</i>        | 262.17   | 8.40   | 1.98E-09 | 2.22E-07 |
| <i>Gm24283</i>       | 36.06    | 8.40   | 1.53E-15 | 5.96E-13 |
| <i>Hapln1</i>        | 232.78   | 8.30   | 8.39E-12 | 1.69E-09 |
| <i>Acsbg2</i>        | 20.54    | 8.23   | 4.01E-09 | 4.18E-07 |
| <i>Myzap</i>         | 406.72   | 8.20   | 2.11E-11 | 3.73E-09 |
| <i>Slco1c1</i>       | 1776.55  | 8.20   | 4.04E-11 | 6.69E-09 |
| <i>Allc</i>          | 22.61    | 8.15   | 3.07E-10 | 4.22E-08 |
| <i>Ushbp1</i>        | 1659.27  | 8.13   | 9.69E-14 | 2.79E-11 |
| <i>Ptgis</i>         | 730.64   | 8.03   | 9.58E-10 | 1.18E-07 |
| <i>Shbg</i>          | 32.10    | 8.01   | 1.37E-09 | 1.63E-07 |
| <i>T</i>             | 121.42   | 7.97   | 2.40E-10 | 3.37E-08 |
| <i>Prnd</i>          | 159.22   | 7.92   | 3.75E-12 | 8.00E-10 |
| <i>Tecl1</i>         | 18.10    | 7.86   | 2.62E-04 | 4.75E-03 |
| <i>Gm10258</i>       | 22.95    | 7.84   | 8.03E-06 | 2.95E-04 |
| <i>Nos2</i>          | 173.31   | 7.84   | 3.26E-10 | 4.47E-08 |
| <i>Foxl2os</i>       | 56.12    | 7.84   | 2.04E-13 | 5.65E-11 |

**Table S10**

Related to Figure 3

Top 50 enriched genes in the EMBRACE-isolated microglia population (CD45<sup>medium</sup>, CD11b<sup>pos</sup>, PECAM1<sup>neg</sup>, PDGFRβ<sup>neg</sup>).

| Gene                 | baseMean | log2FC | p value   | FDR       |
|----------------------|----------|--------|-----------|-----------|
| <i>Ctss</i>          | 17584.46 | 17.68  | 2.32E-101 | 1.34E-97  |
| <i>Fcrls</i>         | 15462.25 | 17.49  | 2.86E-99  | 1.32E-95  |
| <i>C1qc</i>          | 13028.88 | 17.28  | 1.30E-101 | 9.95E-98  |
| <i>C1qb</i>          | 17918.06 | 17.00  | 9.11E-130 | 1.05E-125 |
| <i>Fcgr3</i>         | 7037.22  | 16.41  | 8.74E-90  | 3.36E-86  |
| <i>Ly86</i>          | 4920.81  | 15.86  | 1.77E-77  | 3.72E-74  |
| <i>Trem2</i>         | 4014.58  | 15.60  | 3.87E-78  | 8.92E-75  |
| <i>Adgre1</i>        | 4387.59  | 15.24  | 3.40E-89  | 1.12E-85  |
| <i>C1qa</i>          | 6834.11  | 15.16  | 1.14E-65  | 1.46E-62  |
| <i>Cd86</i>          | 2583.89  | 15.14  | 1.60E-53  | 1.19E-50  |
| <i>Rgs1</i>          | 1985.73  | 14.89  | 2.03E-61  | 2.34E-58  |
| <i>Cd84</i>          | 2662.58  | 14.87  | 1.88E-55  | 1.61E-52  |
| <i>Siglech</i>       | 3729.47  | 14.83  | 7.10E-76  | 1.28E-72  |
| <i>Tyrobp</i>        | 4861.84  | 14.64  | 2.33E-41  | 1.12E-38  |
| <i>Rac2</i>          | 3191.76  | 14.64  | 1.21E-73  | 1.86E-70  |
| <i>Spi1</i>          | 3588.60  | 14.36  | 1.16E-78  | 2.98E-75  |
| <i>Clec5a</i>        | 891.88   | 13.80  | 2.07E-54  | 1.64E-51  |
| <i>Ms4a6d</i>        | 926.47   | 13.73  | 3.11E-44  | 1.59E-41  |
| <i>Ncf4</i>          | 831.95   | 13.69  | 8.01E-53  | 5.77E-50  |
| <i>Tifab</i>         | 957.65   | 13.57  | 7.27E-57  | 7.28E-54  |
| <i>Ms4a6b</i>        | 924.84   | 13.51  | 2.27E-54  | 1.75E-51  |
| <i>Ms4a6c</i>        | 760.16   | 13.51  | 2.13E-46  | 1.17E-43  |
| <i>Cd53</i>          | 3796.61  | 13.49  | 5.30E-55  | 4.36E-52  |
| <i>Abcg3</i>         | 828.87   | 13.35  | 1.77E-52  | 1.20E-49  |
| <i>Sash3</i>         | 1171.07  | 13.34  | 2.82E-59  | 2.95E-56  |
| <i>Cd300c2</i>       | 769.03   | 13.31  | 1.25E-59  | 1.37E-56  |
| <i>Ccr1</i>          | 612.11   | 13.06  | 3.84E-35  | 1.38E-32  |
| <i>Bank1</i>         | 644.68   | 13.05  | 1.27E-55  | 1.17E-52  |
| <i>Cx3cr1</i>        | 13140.39 | 13.04  | 1.92E-39  | 8.06E-37  |
| <i>Tnfrsf82</i>      | 629.37   | 12.96  | 2.04E-49  | 1.24E-46  |
| <i>Ccl12</i>         | 527.37   | 12.94  | 1.37E-38  | 5.53E-36  |
| <i>Clec7a</i>        | 525.75   | 12.91  | 5.20E-37  | 2.00E-34  |
| <i>Itgam</i>         | 1330.38  | 12.88  | 4.69E-66  | 6.36E-63  |
| <i>Nlrp3</i>         | 826.51   | 12.85  | 1.76E-55  | 1.56E-52  |
| <i>Cd48</i>          | 466.81   | 12.84  | 7.48E-43  | 3.67E-40  |
| <i>Casp1</i>         | 706.43   | 12.82  | 1.63E-52  | 1.14E-49  |
| <i>Dock2</i>         | 2034.59  | 12.81  | 3.76E-29  | 9.11E-27  |
| <i>Ptprc</i>         | 4962.73  | 12.81  | 2.46E-37  | 9.62E-35  |
| <i>Ly9</i>           | 405.13   | 12.70  | 4.00E-46  | 2.10E-43  |
| <i>Ccl9</i>          | 656.87   | 12.66  | 6.82E-48  | 3.93E-45  |
| <i>A130071D04Rik</i> | 596.88   | 12.65  | 8.07E-33  | 2.55E-30  |
| <i>Il1b</i>          | 396.85   | 12.60  | 1.40E-40  | 6.21E-38  |
| <i>Gm1966</i>        | 423.74   | 12.60  | 1.50E-34  | 5.24E-32  |
| <i>Cd300lf</i>       | 394.87   | 12.52  | 3.72E-35  | 1.36E-32  |
| <i>Blnk</i>          | 1015.81  | 12.35  | 1.42E-70  | 2.05E-67  |
| <i>Nlrp1b</i>        | 388.92   | 12.31  | 1.83E-46  | 1.03E-43  |
| <i>Crybb1</i>        | 2631.46  | 12.20  | 2.47E-19  | 2.79E-17  |
| <i>Aif1</i>          | 5410.21  | 12.20  | 2.00E-22  | 2.93E-20  |
| <i>Fcgr2b</i>        | 339.37   | 12.16  | 2.28E-48  | 1.34E-45  |
| <i>Bcl2a1b</i>       | 268.20   | 12.11  | 4.77E-41  | 2.20E-38  |

## TRANSPARENT METHODS

### Animals

All animal studies were performed according to the German animal care and ethics legislation and approved by the Committee on Research Animal Care, Regierungspräsidium Freiburg. Mice were maintained on a C57BL/6 background, under a 12-hour light and dark cycle and water and standard chow were provided ad libitum. The morning after a vaginal plug was detected was designated E0.5.

### Brain dissociation

Brains from E14.5 embryos were acutely isolated and meninges were removed under a dissecting microscope. Four methods were trialed, with Liberase + DNase I performing the best according to cell survival, overall digestion as well as the retention of cell surface markers (Table S1). Each of the methodologies is detailed below.

#### *Liberase and DNase I*

E14.5 brains were transferred to 1.5 ml eppendorf tubes. To each tube, 475  $\mu$ l of PBS containing 5 mM  $MgCl_2$ , 20  $\mu$ l DNase I (final concentration 80 U/ml, New England Biolabs #M0303) and 5  $\mu$ l Liberase TM (final concentration 0.13 WU/ml, Roche 05401119001) were added. Samples were incubated in a thermomixer (37°C, 800 rpm) for 40 minutes. Samples were gently triturated using a P1000 pipette at 20 minutes and again at the end of the 40 minutes. Samples were filtered through a 100  $\mu$ m sieve and cells collected by centrifugation (250 g, room temperature, 4 minutes, swing bucket rotor) and resuspended in FACS buffer (PBS supplemented with 2% fetal calf serum).

The same methodology was used for the *Liberase only* test, with the exception that DNase I was excluded.

#### *Pancreatin trypsin*

Embryonic E14.5 brains were transferred to 500  $\mu$ l dissociation solution containing 2.5% w/v pancreatin (Sigma P3292) and 0.5% w/v trypsin (Gibco 27250-018) in PBS. Tubes were incubated on ice for 30 minutes and flicked occasionally to ensure mixing. After 30 minutes, the dissociation solution was removed and samples incubated at 37°C for 5 minutes in a water bath. Next, 2% FCS / PBS was added and the brains mechanically dissociated using a P1000 pipette and passed through a 100  $\mu$ m sieve prior to analysis.

#### *Collagenase and dispase*

Collagenase and Dispase were purchased from Roche (10269638001) and used according to the manufacturer's recommendations at a concentration of 1 mg/ml (w/v).

#### *No enzyme*

E14.5 brains were placed in FACS buffer and triturated ~10 times using a P1000 pipette. Samples were collected by centrifugation (250 g, room temperature, 4 minutes, swing bucket rotor) and tested for cell viability.



## Flow cytometry

Dissociated E14.5 brains were washed once in PBS supplemented with 5 mM MgCl<sub>2</sub>. Cells were passed through a 100 µm sieve, resuspended in 400 µl FACS buffer (PBS + 2% fetal calf serum) containing the PDGFR $\beta$  antibody (R+D, Table S2) and incubated on ice for 30 minutes. After two washes in FACS buffer at 4°C, cells were resuspended in 400 µl FACS buffer containing antibodies raised against CD11b, CD41, CD45, CD102 (ICAM2) and PECAM1 (CD31) as well as the Alexa488-conjugated anti-goat IgG (ThermoFisher A11055) at the indicated concentrations (Table S2). Zombie dye (Biolegend 423106, 1:200) was added to the mix as a viability marker. Cells were incubated on ice for 45 minutes, washed three times in ice cold FACS buffer, collected by centrifugation (250 g, 4°C) in a swinging bucket rotor and sorted on the FACS ARIA (BD Biosciences) using a 100 µm nozzle. For scRNA-seq analysis, cells were sorted into 384 well plates and processed according to the mCEL-Seq2 protocol (see below). For bulk populations, cells were collected in ice-cold FACS buffer, centrifuged (300 g, 4 minutes, 4°C) in a swing bucket rotor. Cell pellets were snap frozen and stored at -80°C. RNA from neural cells was isolated using the Qiagen mini kit (#74104), while RNA from mural cells, endothelial cells and microglia was extracted using the Qiagen miRNeasy Micro kit (#1071023). Libraries for RNA-seq of the neural population were prepared using the Illumina TruSeq library preparation kit. For mural cells, endothelial cells and microglia, cDNA was prepared from isolated RNA using the SMART-Seq v4 Ultra Low Input RNA Kit for Sequencing (Clontech 634891). Libraries were prepared using the Nextera XT DNA library preparation kit (Illumina FC-131-1096) and sequenced on the HiSeq 2500 instrument.

## Single cell RNA sequencing

scRNA-seq was performed according to the mCEL-Seq2 protocol (Hashimshony et al., 2016; Herman et al., 2018). Single cells were index sorted into 384-well plates containing 240 nl of primer mix and 1.2 µl of mineral oil (Sigma-Aldrich). A FACS-ID for each individual well was assigned according to the gating strategy. The plates were centrifuged at 2200 g for 10 minutes at 4°C, snap-frozen in liquid nitrogen and stored at -80°C until processing. RNA was reverse transcribed using 160 nl of reverse transcription reaction mix and 2.2 µl of second strand reaction mix. cDNA from 96 cells was pooled together before clean up and *in vitro* transcription, generating 4 libraries from each 384-well plate. 0.8 µl of AMPure/RNAClean XP beads (Beckman Coulter) per 1 µl of sample were used during all the purification steps including the library clean up. Other steps were performed as described in the protocol (Herman et al., 2018). Libraries were sequenced on an Illumina HiSeq 3000 sequencing system (pair-end multiplexing run, high output mode) at a depth of ~200,000 reads per cell.

## Bioinformatic analyses

Raw sequencing data for both single cell and bulk experiments were controlled for quality, trimmed and mapped to the reference mm10 genome using STAR (Dobin et al., 2013). The identity of reads

was identified through FeatureCount (Liao et al., 2014). For scRNA-seq analyses, the RNA expression matrices from each cell were merged and further analysed with the RaceID3 software package (Herman et al., 2018). Cells with less than 1500 unique transcripts were discarded, which left 625 cells for downstream analysis. For downstream analyses, ribosomal genes as well as the highly expressed ncRNA *Malat1* were removed. Cells were clustered using k-medoids and the clustering result was confirmed using the random forest algorithm within the RaceID3 package. Clusters from the scRNA-seq data were visualized through the two-dimension t-distributed stochastic neighbour embedding (tSNE) algorithm within the RaceID3 package. For both scRNA-seq and the bulk RNA-seq analyses, differentially expressed genes between the cell types or cell clusters were identified using DESeq2 (Love et al., 2014).

Inter-cellular ligand-receptor interaction networks were calculated based on the publically available database collated by Ramilowski and co-workers (Ramilowski et al., 2015). Mouse orthologs of human genes were obtained using the biomaRt R package (Durinck et al., 2005; Durinck et al., 2009). The connection between cell type and itself (autocrine) or another cell type (paracrine) was established if the receptor and its associated ligand were expressed in at least one of the four cell types. The ligand or receptor was considered expressed in each scRNA-seq cluster if the mean expression per cluster was higher than 0.7 normalised transcripts. In contrast, the ligand or receptor was considered expressed in the bulk RNA-seq dataset if the mean expression per cell type was higher than 10 FPKM, and the respective ligand or receptor expression in the given cell type was higher than 10% of maximal expression of the given ligand/receptor in any cell type. Directionality of a given interaction was determined by the cell type expressing the ligand. Colours in Figures 4B and S3B correspond to the cell type or cluster expressing the ligand, while the thickness of the lines is proportional to the number of interaction pairs between cell types. For visualization of interaction networks, the igraph (Csardi and Nepusz, 2006) and iTALK (Wang et al., 2019) R packages were utilized. The network of top 50 enriched interactions was generated with the additional criterion for the ligands to be enriched with an enrichment score > 0.5 in a cell type. For ranking the ligand-receptor interactions, the absolute expression (FPKM) of both the ligand and receptor in each interacting pair was taken into account. The enrichment score was calculated for each gene based on the normalized DESeq2 gene expression matrix; Mean expression of a gene across all cell types was subtracted from the expression levels of that gene in a particular cell type, and subsequently divided by the standard deviation. Thus, the enrichment score for a particular gene in a cell type represents the number of standard deviations from its mean expression across all analysed cell types.

### **Generation of the Brain Interactome Explorer website**

The R code for generating circos plots from normalized expression values was wrapped in a shiny app using CRAN R package shiny version 1.3.2 (Chang et al., 2019) and R version 3.6. The resulting shiny app 'Brain Interactome Explorer' version 1.0.0 is served on shinyapps.io under <https://mpi-ie.shinyapps.io/braininteractomeexplorer/>. The R code underlying the app is available under <https://github.com/maxplanck-ie/BrainInteractomeExplorer>.

## **Immunofluorescence**

### *Testing of vascular PECAM1, ICAM2, PDGFR $\beta$ and NG2 antibodies*

Brains were isolated from E14.5 embryos, meninges removed and both cortices isolated. The dissected cortices were fixed in 4% paraformaldehyde at room temperature for 30 minutes. After brief washing, samples were stored in 100% methanol at 4°C. For staining, the cortices were washed in 50% methanol for 10 minutes, once in PBS for 10 minutes and twice in wash buffer (0.1% Triton X-100 in PBS) for 15 minutes each. Samples were blocked in 10% fetal calf serum (FCS) for 1 hour at room temperature and then incubated with primary antibodies raised against PDGFR $\beta$  and PECAM1 (CD31, (1:50), diluted in wash buffer supplemented with 10% FCS, overnight at 4°C. The cortices were subsequently processed through the wash buffer three times (10 minutes each) at 4°C and then three times at room temperature. The cortices were incubated with secondary antibodies (Donkey anti-goat Alexa488, A21206, 1:400; donkey anti-rabbit Alexa555, A31572, 1:400) diluted in FACS buffer and incubated at room temperature for 2 hours. The samples were then washed three times at 4°C for 10 minutes each and subsequently three times for 1 hour at room temperature. The cortices were subsequently stained with DAPI (1:1000 diluted in PBS) for 30 minutes at room temperature and washed three times for 10 minutes each. The stained cortices were flattened, mounted in Fluoromount and imaged using the LSM780 microscope from Zeiss using the 63x oil objective. Data were processed using the Zen Blue software (Zeiss).

### *Immunofluorescence analyses of overlap in protein localisation*

Freshly dissected E14.5 brains were fixed in 4% paraformaldehyde at room temperature for 2 hours, washed with PBS and embedded in a 25% albumin; 6% gelatine solution. Embedded samples were fixed further in 4% paraformaldehyde overnight, washed and subsequently stored in PBS until sectioning. Approximately 100  $\mu$ m thick sections were cut on a vibratome and slices were released in PBS. Each section was transferred to a well of a 24-well plate for subsequent staining. For stainings with antibodies against IBA1, APOE, LDLR, LRP1 and  $\beta$ III-tubulin, sections were permeabilized and blocked in PBS containing 0.5% TritonX-100 and 0.25% gelatine overnight at 4°C and all antibody incubations were carried out in PBS supplemented with 0.25% gelatine. For stainings with antibodies raised against VTN, KDR, PECAM1, LAMA4 and ITGB1, sections were permeabilised and blocked in PBS containing 0.5% Triton X-100 and 10% FCS overnight at 4°C. All samples were incubated with the respective combinations of primary antibodies (1:200) overnight at 4°C, washed four times for 30 minutes each at room temperature, and incubated with the appropriate secondary antibodies (donkey anti-goat 594 (1:250, Life Technologies #A11058), donkey anti-rabbit 488 (1:250, Life Technologies #A11055), goat anti-mouse 594 (1:250, Life Technologies #A11032), donkey anti-rabbit 555 (1:250, Life Technologies #A31572), goat anti-mouse 488 (1:250, Life Technologies #A11001)) overnight at 4°C. After a further 4 washes in PBS, samples were stained with DAPI (1:250, 20 minutes, RT), mounted onto slides with Fluoromount and imaged using the Zeiss Airyscan LSM 880 microscope with the 25x oil objective. Data were processed using the Zen Blue software (Zeiss).

### **Co-immunoprecipitation assays**

Cell lysates were prepared in HMG150 buffer (25 mM HEPES pH 7.6, 12.5 mM MgCl<sub>2</sub>, 10% glycerol, 150 mM KCl, 0.5% Tween-20 and Protease Inhibitor Complete Mini (Roche #04693159001)) from wild type snap frozen E14.5 brains and 250 µg of protein were used for each IP. A mixture of Protein A/G beads (Sepharose 4 Fast Flow Protein G (GE Healthcare #17-0618-05) and Protein A (GE Healthcare #17-5280-02)) were blocked by incubating with 0.2 mg/ml BSA in HMG150 for 30 minutes at 4°C. After pre-clearing brain lysates with 100 µl of a Protein A/G beads-slurry, 5 µg of the anti-APOE antibody were added and samples incubated overnight at 4°C. IPs with rabbit IgG (Rb-IgG, Abcam #ab172730) were used as controls. Next, 100 µl of blocked Protein A/G beads-slurry were added, samples incubated at 4°C for 1 hour and washed 3 times in HMG150 for 10 minutes each. Immunoprecipitated protein was eluted in ROTI-load (Roth #K929.1), boiled briefly and run on a 4-12% gradient gel (NuPAGE, Life Technologies #NP0321Box). Following transfer onto 0.45 µm PVDF membranes (ImmobilonP Membrane, Millipore #IPVH00010), membranes were blocked in 5% skim milk, incubated overnight at 4°C with antibodies raised against APOE and LRP1 (1:1000). After washing, the membranes were incubated with the HRP-conjugated anti-rabbit or anti-goat antibodies (ECL anti-rabbit HRP, GE Healthcare #NA934 and ECL anti-goat HRP, Santa Cruz #sc2354) for 1 hour at room temperature, washed and developed on the Chemi Doc System (Biorad), using the Lumi-Light reagent (Lumi Light Plus Western Blotting Substrate, Roche #12015196001).

### **Data and software availability**

The Brain Interactome Explorer is available at <https://mpi-ie.shinyapps.io/braininteractomeexplorer/>.

Raw sequencing data have been uploaded to GEO and are available under GSE133079.

## SUPPLEMENTARY REFERENCES

- Chang, W., Cheng, J., Allaire, J.J., Xie, Y., and McPherson, J. (2019). shiny: Web Application Framework for R. R package version 1.3.2. (<https://CRAN.R-project.org/package=shiny>).
- Csardi, G., and Nepusz, T. (2006). The igraph software package for complex network research. *InterJournal, Complex Systems* 1695.
- Dobin, A., Davis, C.A., Schlesinger, F., Drenkow, J., Zaleski, C., Jha, S., Batut, P., Chaisson, M., and Gingeras, T.R. (2013). STAR: ultrafast universal RNA-seq aligner. *Bioinformatics* 29, 15-21.
- Durinck, S., Moreau, Y., Kasprzyk, A., Davis, S., De Moor, B., Brazma, A., and Huber, W. (2005). BioMart and Bioconductor: a powerful link between biological databases and microarray data analysis. *Bioinformatics* 21, 3439-3440.
- Durinck, S., Spellman, P.T., Birney, E., and Huber, W. (2009). Mapping identifiers for the integration of genomic datasets with the R/Bioconductor package biomaRt. *Nat Protoc* 4, 1184-1191.
- Hashimshony, T., Senderovich, N., Avital, G., Klochendler, A., de Leeuw, Y., Anavy, L., Gennert, D., Li, S., Livak, K.J., Rozenblatt-Rosen, O., *et al.* (2016). CEL-Seq2: sensitive highly-multiplexed single-cell RNA-Seq. *Genome Biol* 17, 77.
- Herman, J.S., Sagar, and Grun, D. (2018). FateID infers cell fate bias in multipotent progenitors from single-cell RNA-seq data. *Nat Methods* 15, 379-386.
- Liao, Y., Smyth, G.K., and Shi, W. (2014). featureCounts: an efficient general purpose program for assigning sequence reads to genomic features. *Bioinformatics* 30, 923-930.
- Love, M.I., Huber, W., and Anders, S. (2014). Moderated estimation of fold change and dispersion for RNA-seq data with DESeq2. *Genome Biol* 15, 550.
- Ramilowski, J.A., Goldberg, T., Harshbarger, J., Kloppmann, E., Lizio, M., Satagopam, V.P., Itoh, M., Kawaji, H., Carninci, P., Rost, B., *et al.* (2015). A draft network of ligand-receptor-mediated multicellular signalling in human. *Nature communications* 6, 7866.
- Rosenberg, A.B., Roco, C.M., Muscat, R.A., Kuchina, A., Sample, P., Yao, Z., Grayback, L.T., Peeler, D.J., Mukherjee, S., Chen, W., *et al.* (2018). Single-cell profiling of the developing mouse brain and spinal cord with split-pool barcoding. *Science* 360, 176-182.
- Sheikh, B.N., Dixon, M.P., Thomas, T., and Voss, A.K. (2012). Querkopf is a key marker of self-renewal and multipotency of adult neural stem cells. *Journal of cell science* 125, 295-309.
- Vanlandewijck, M., He, L., Mae, M.A., Andrae, J., Ando, K., Del Gaudio, F., Nahar, K., Lebouvier, T., Lavina, B., Gouveia, L., *et al.* (2018). A molecular atlas of cell types and zonation in the brain vasculature. *Nature* 554, 475-480.
- Wang, Y., Wang, R., Zhang, S., Song, S., Jiang, C., Han, G., Wang, M., Ajani, J., Futreal, A., and Wang, L. (2019). iTALK: an R Package to Characterize and Illustrate Intercellular Communication. *bioRxiv*.
- Zeisel, A., Hochgerner, H., Lonnerberg, P., Johnsson, A., Memic, F., van der Zwan, J., Haring, M., Braun, E., Borm, L.E., La Manno, G., *et al.* (2018). Molecular Architecture of the Mouse Nervous System. *Cell* 174, 999-1014 e1022.
